# Supplementary material for: Increasing Cellular Uptake and Permeation of Curcumin Using a Novel Polymer-Surfactant Formulation
Source: Biomolecules. 2022 Nov 23;12(12):1739. doi: 10.3390/biom12121739 (PMC9775279; doi:10.3390/biom12121739)
Supplement: Supplementary file 1 [file biomolecules-12-01739-s001.zip]

Archive with 18 entries (18 files):
- Figure S1.pdf
- Figure S2.pdf
- New Figure 1.pdf
- New Figure 10.pdf
- New Figure 11.pdf
- New Figure 12.pdf
- New Figure 13.pdf
- New Figure 14.pdf
- New Figure 15.pdf
- New Figure 16.pdf
- New Figure 2.pdf
- New Figure 3.pdf
- New Figure 4.pdf
- New Figure 5.pdf
- New Figure 6.pdf
- New Figure 7.pdf
- New Figure 8.pdf
- New Figure 9.pdf
