# Supplementary figures and images for: Increasing Cellular Uptake and Permeation of Curcumin Using a Novel Polymer-Surfactant Formulation
Source: MDPI journal article supplement (doi:10.3390/biom12121739), 2022-11-23

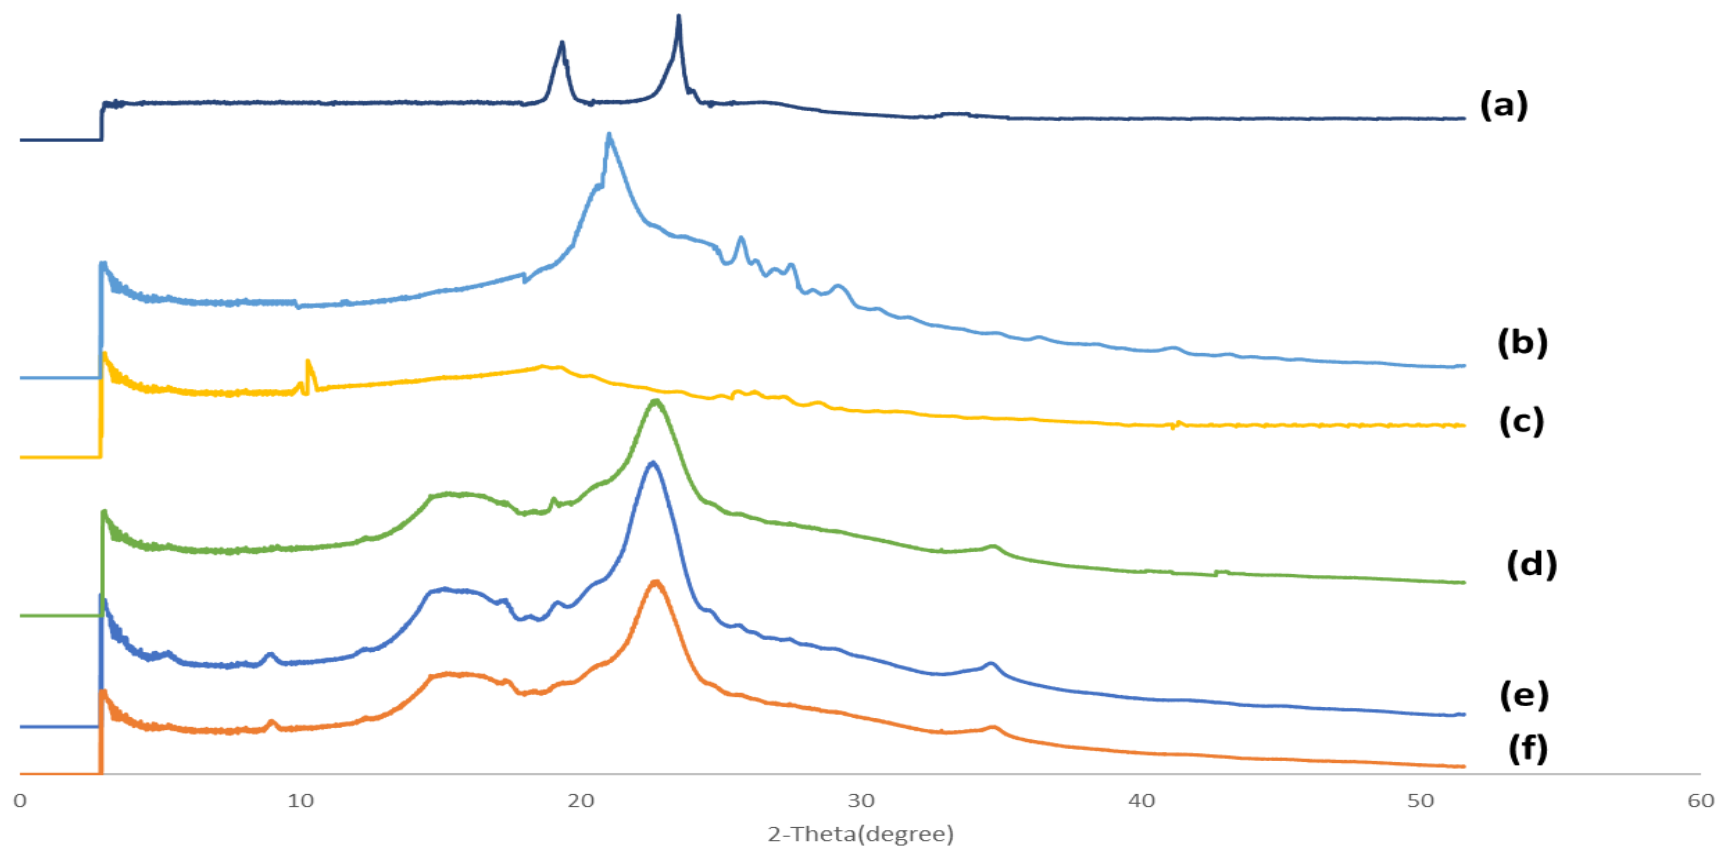

Supplement: s1 [file s1]

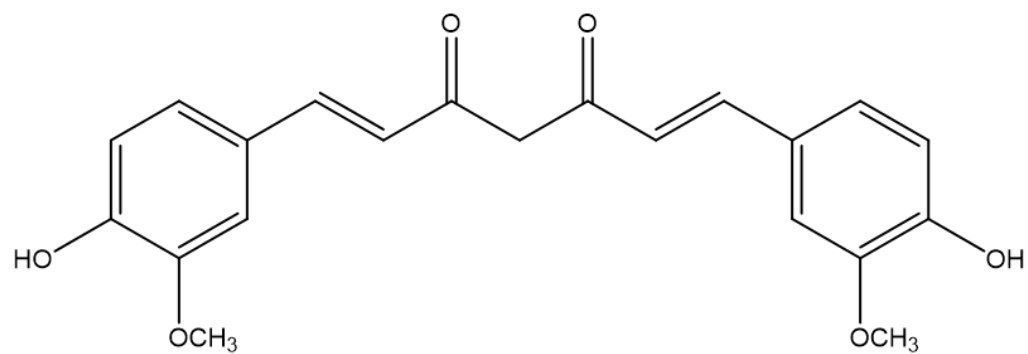

Keto form of Curcumin

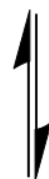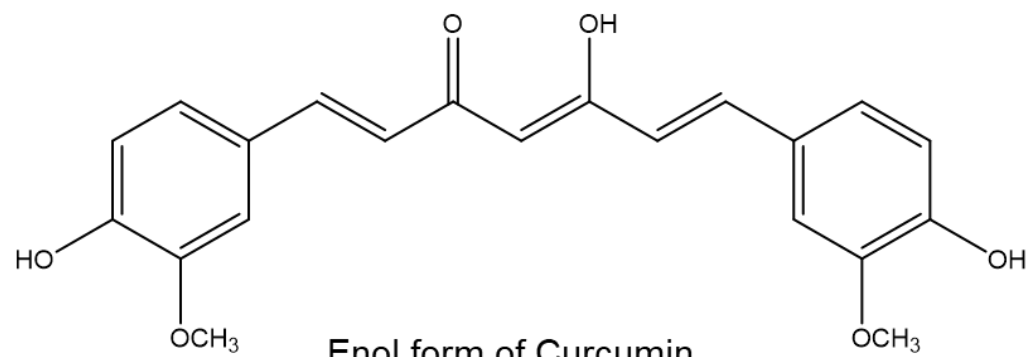

Enol form of Curcumin

Supplement: s1 [file s1]

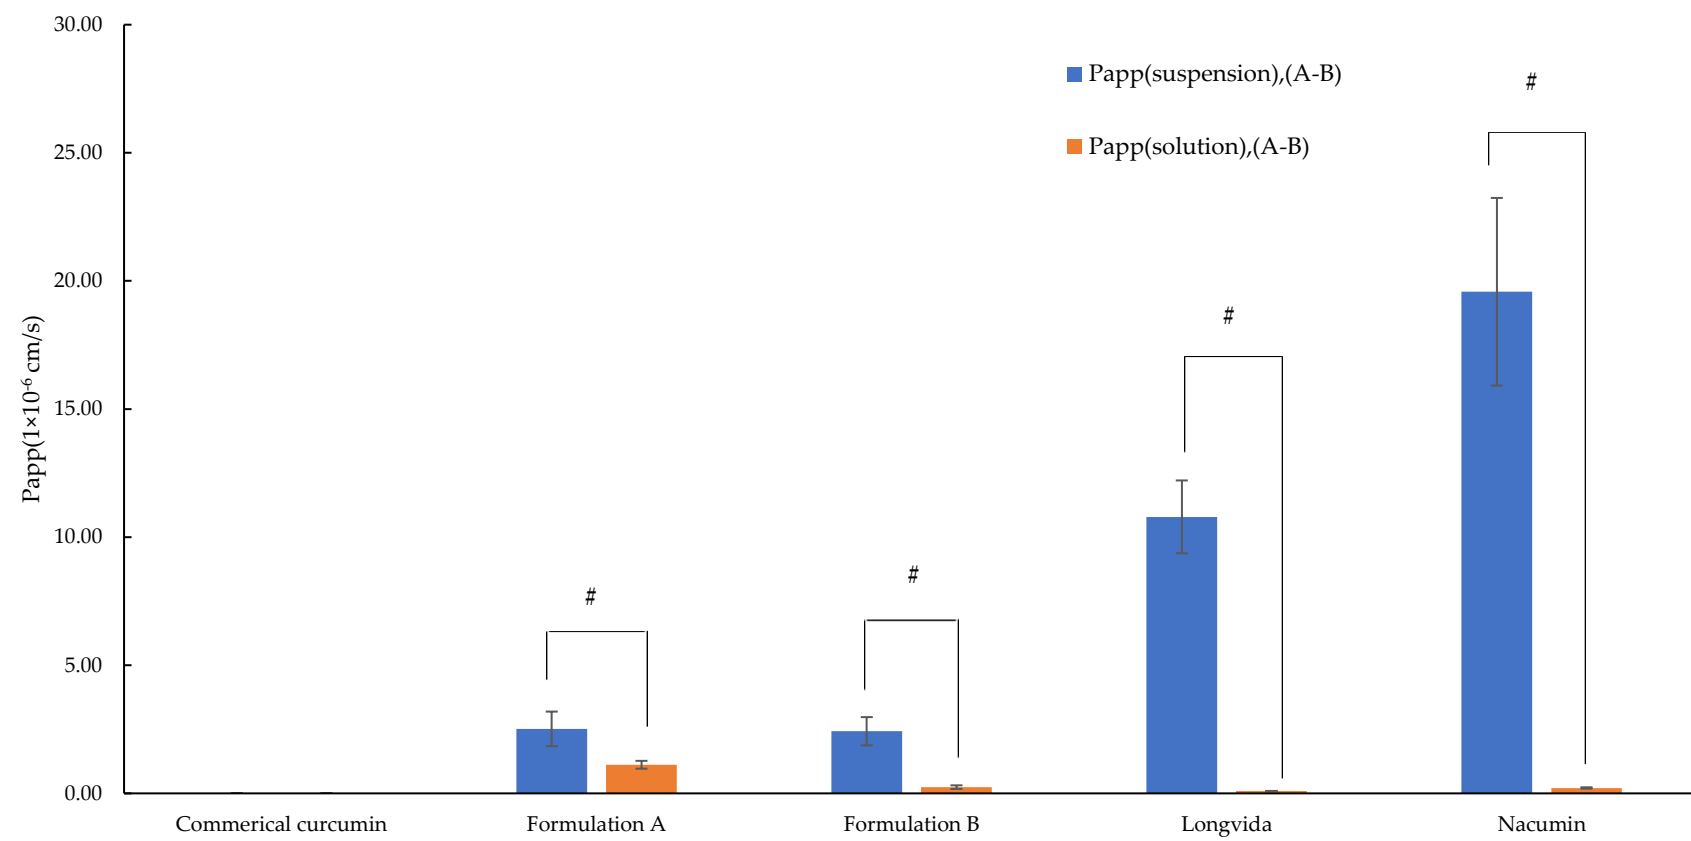

Supplement: s1 [file s1]

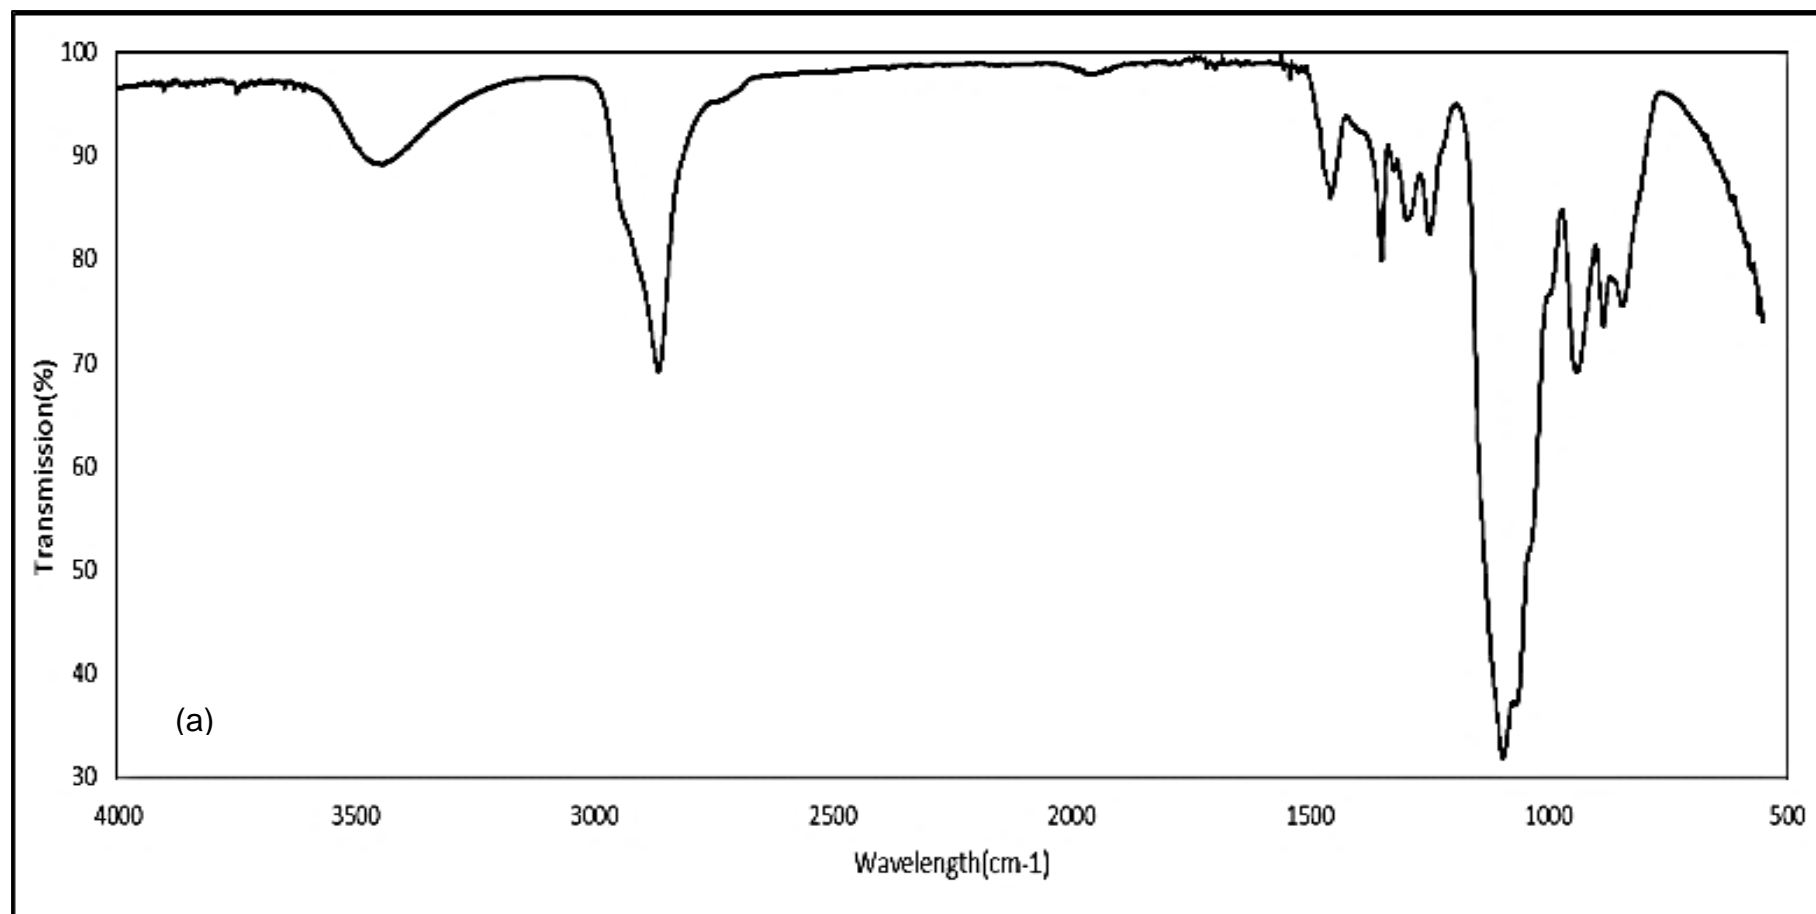

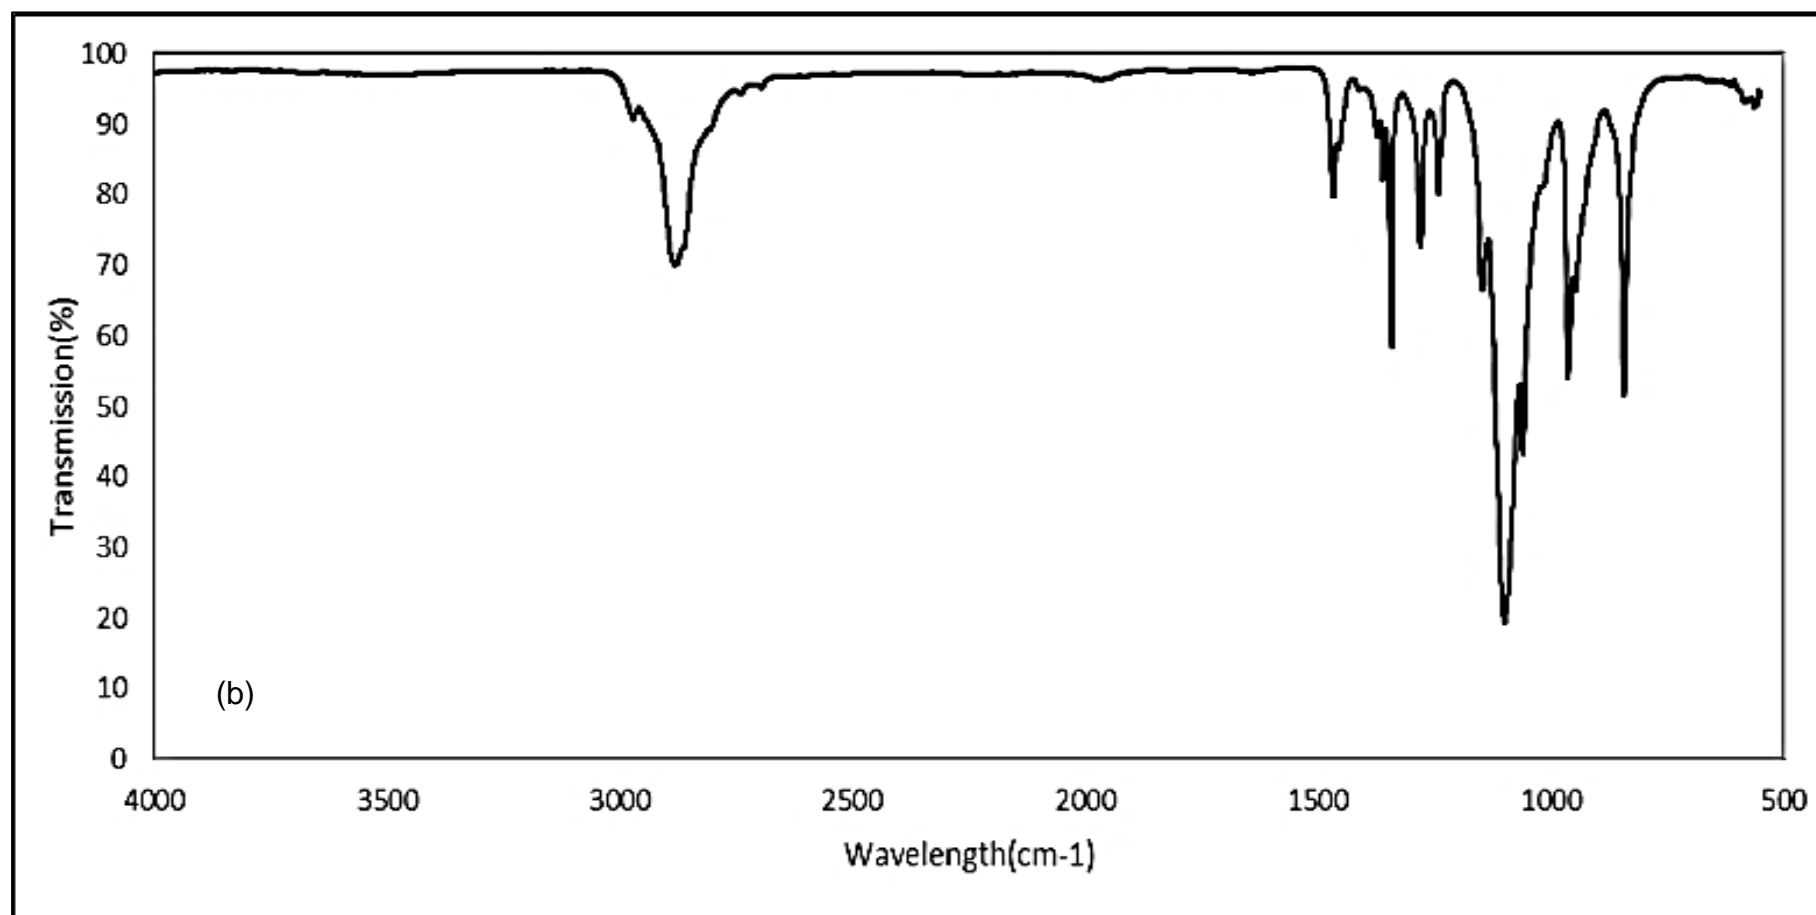

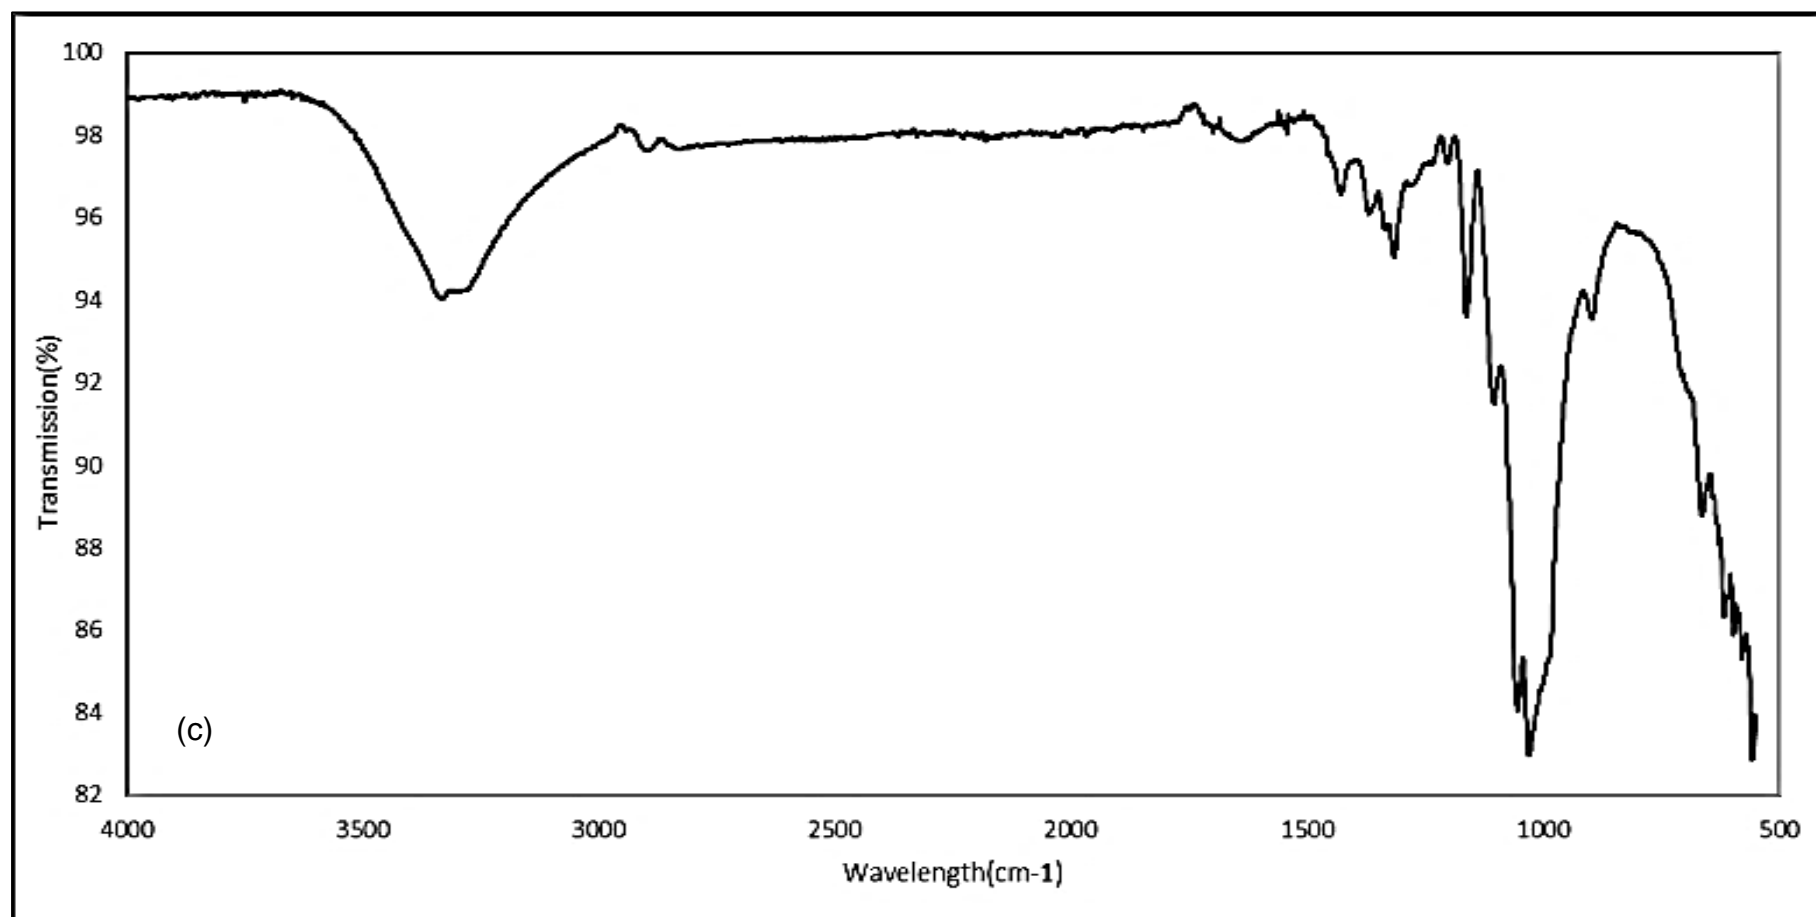

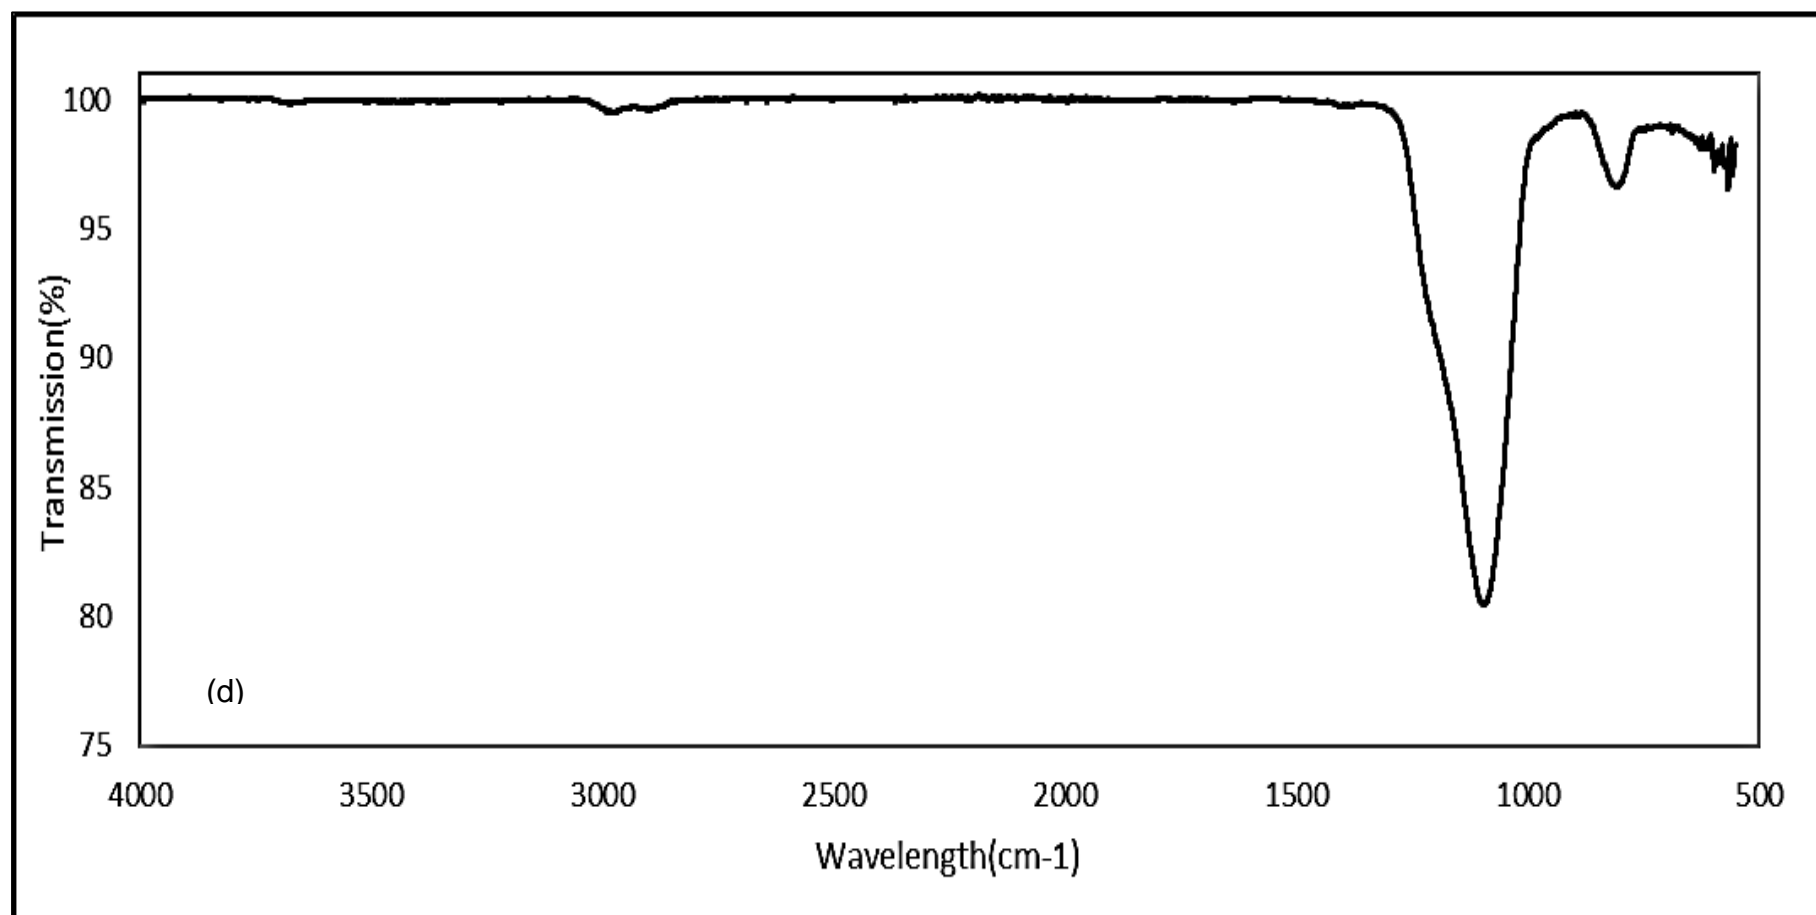

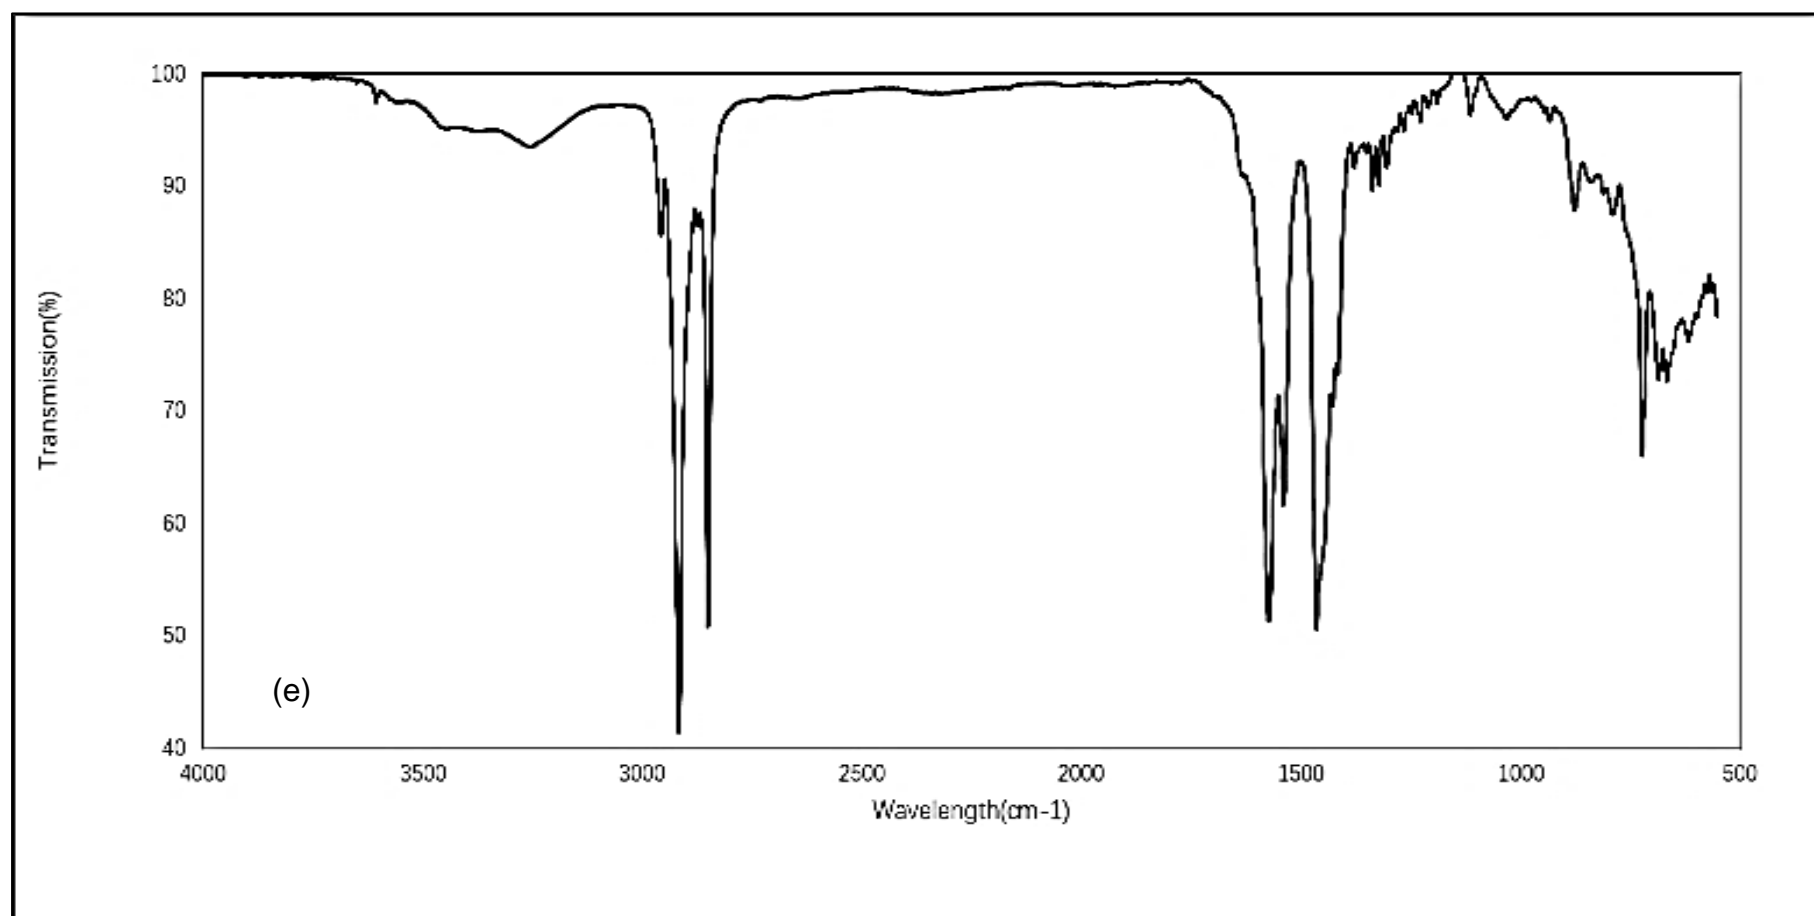

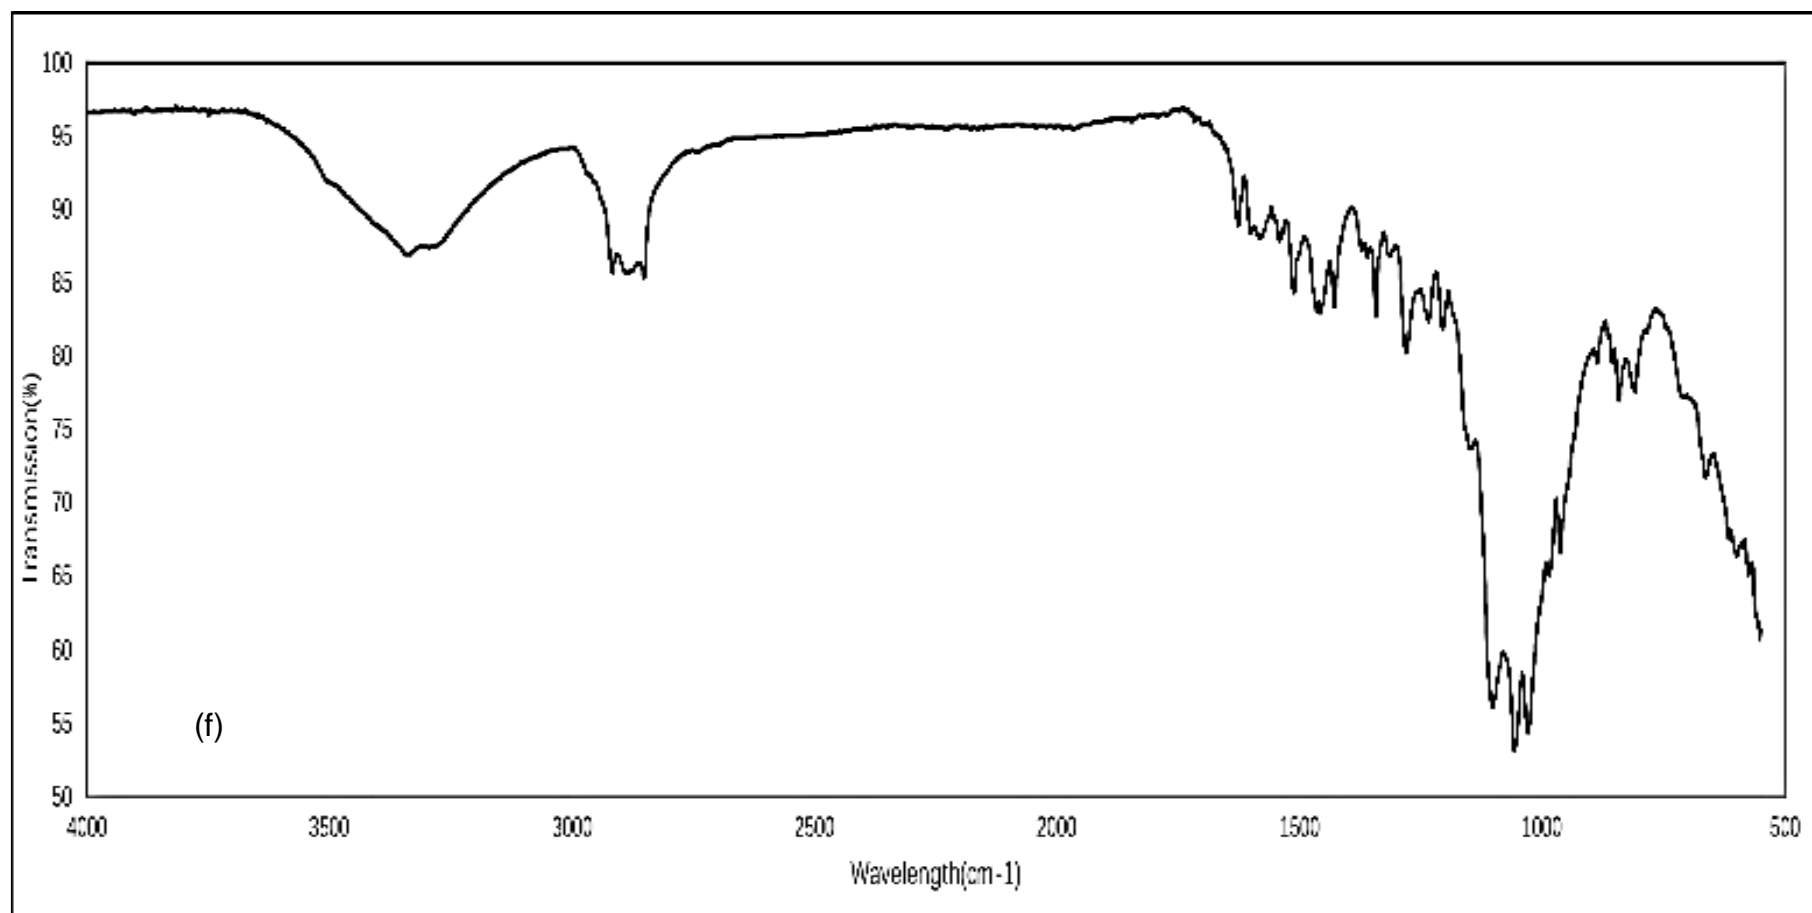

Supplement: s1 [file s1]

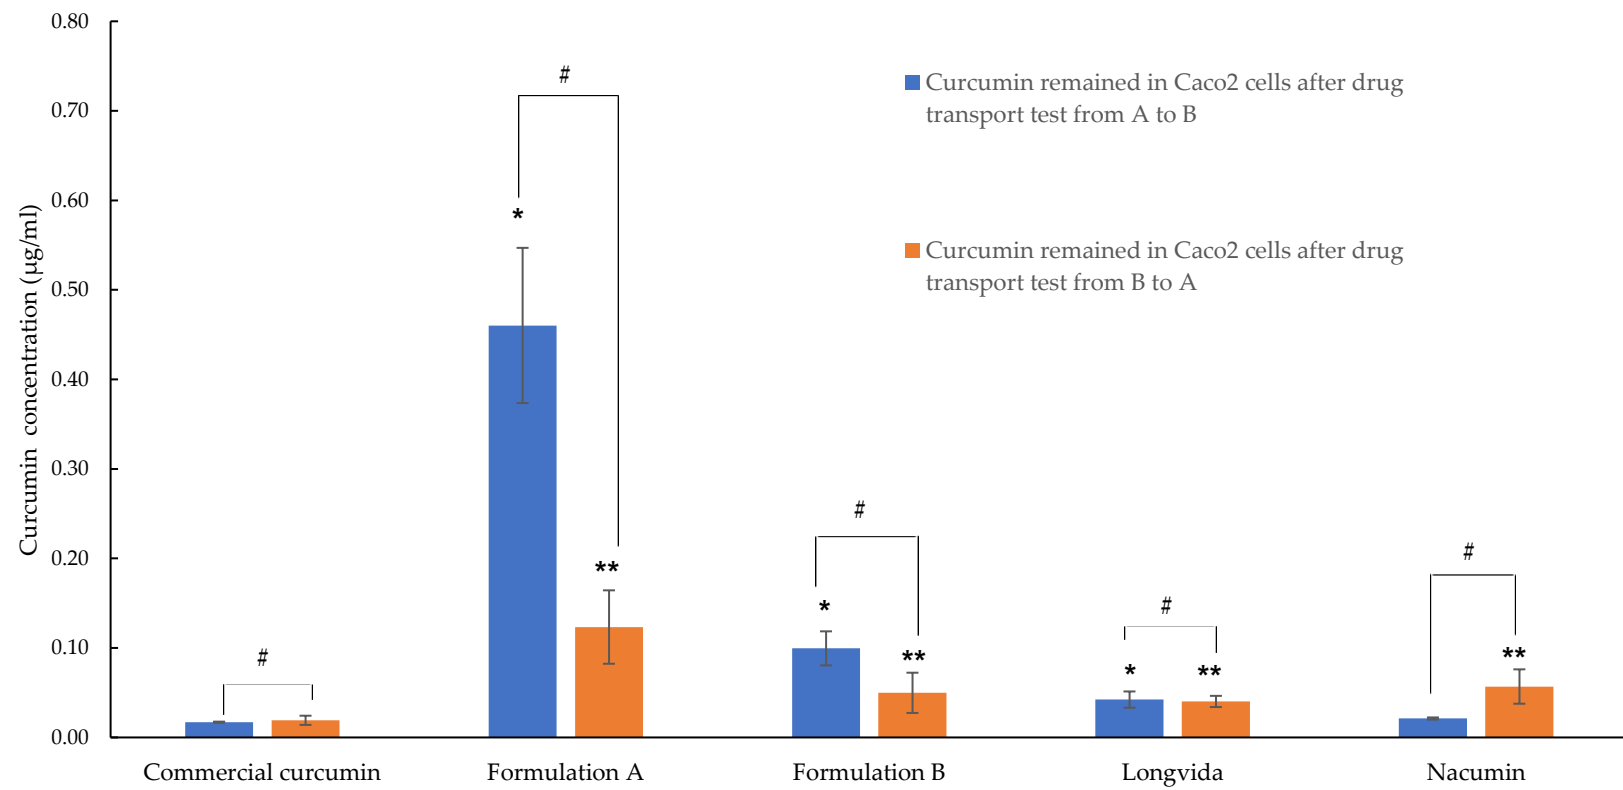

Supplement: s1 [file s1]

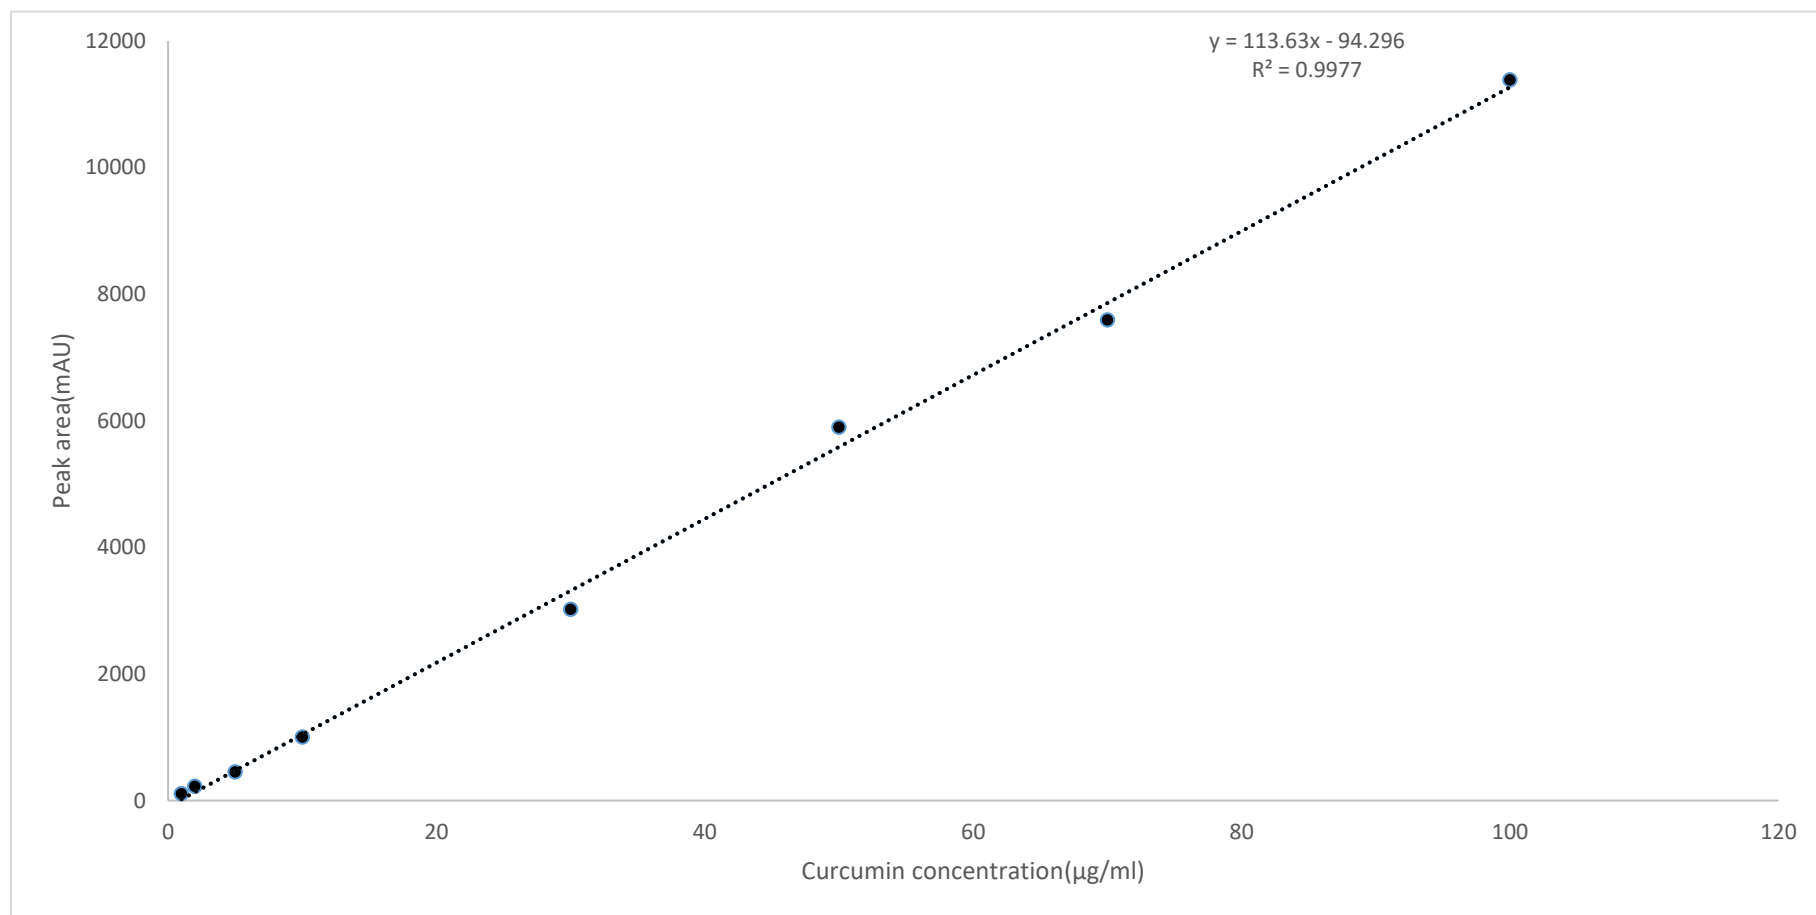

Supplement: s1 [file s1]

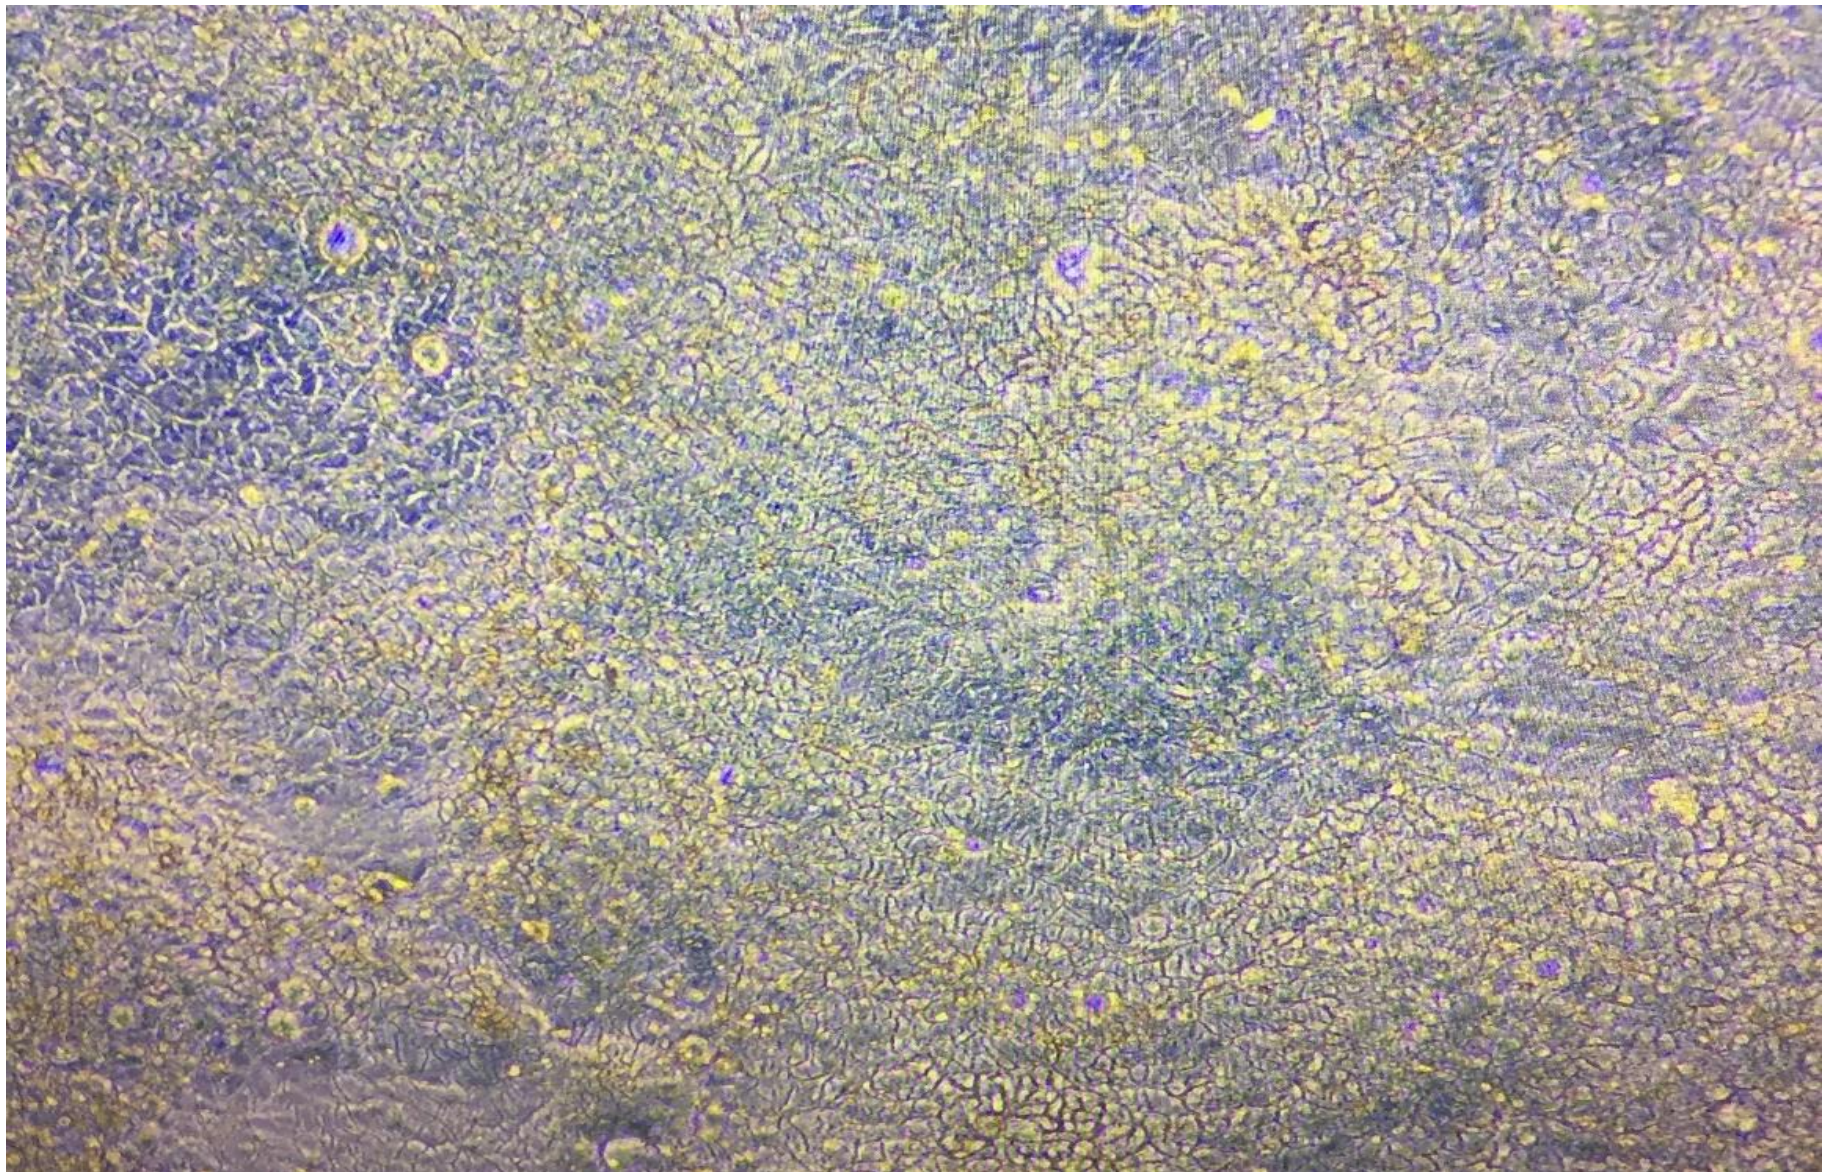

Supplement: s1 [file s1]

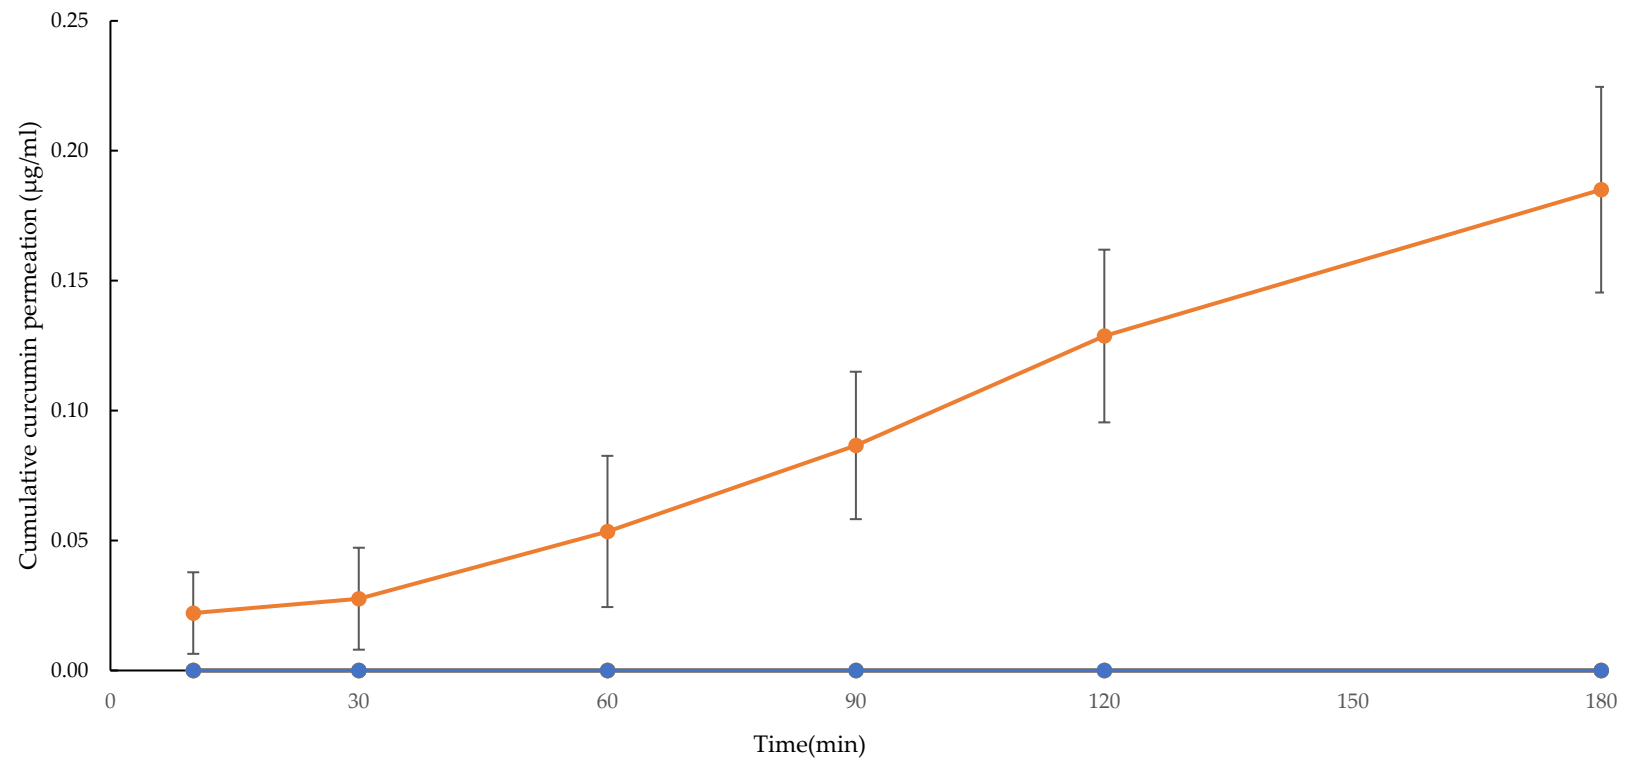

Commercial curcumin

Formulation A

Formulation B

Longvida

Nacumin

Supplement: s1 [file s1]

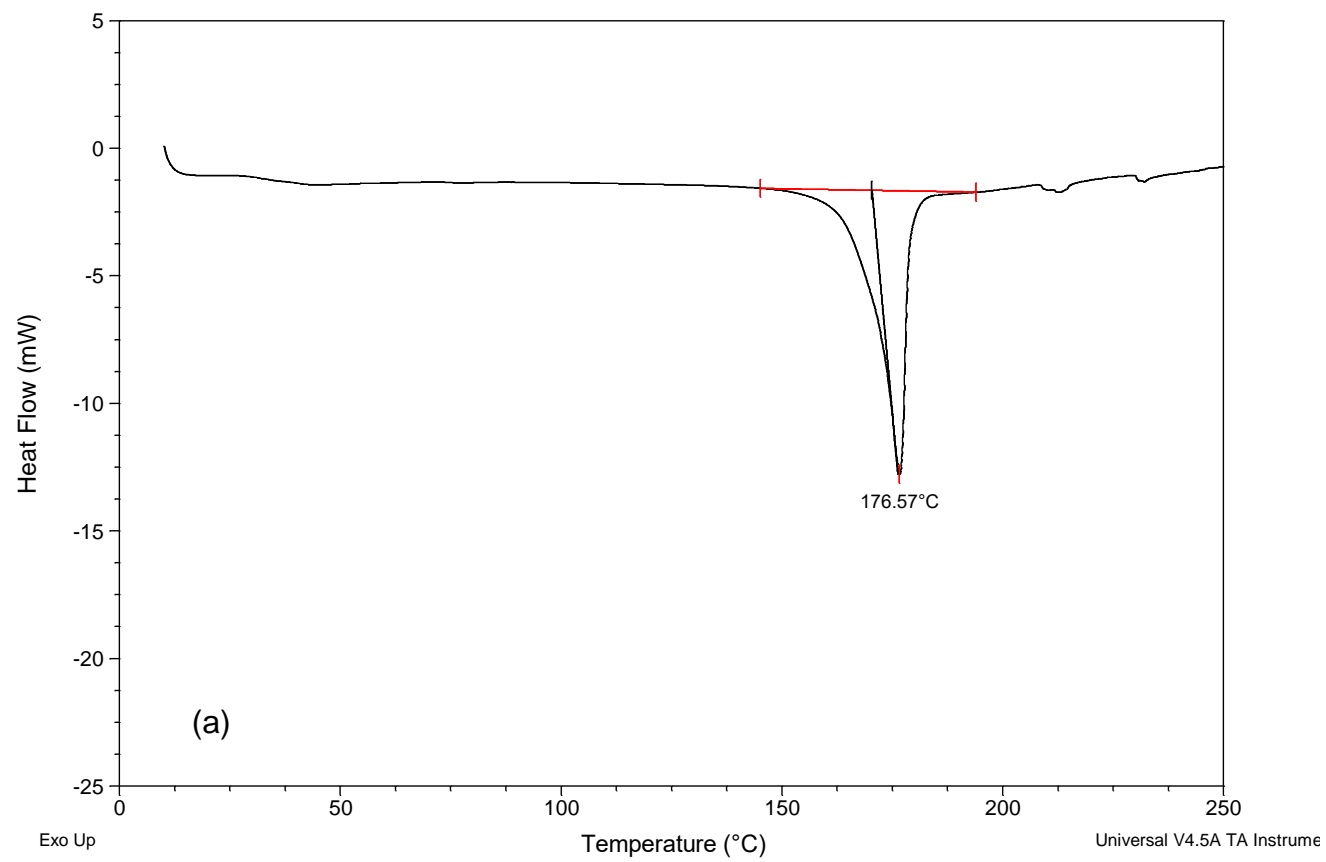

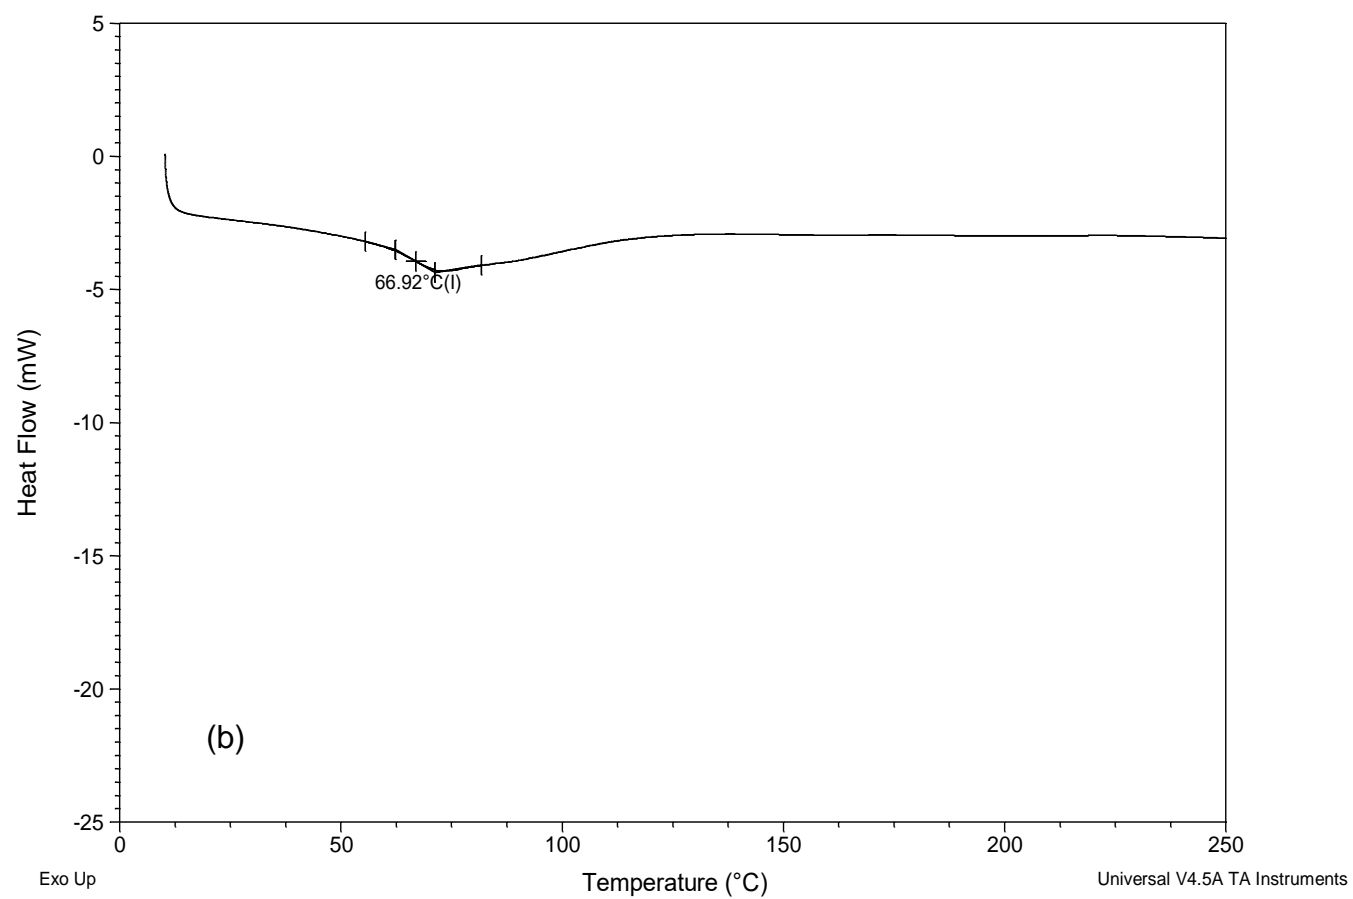

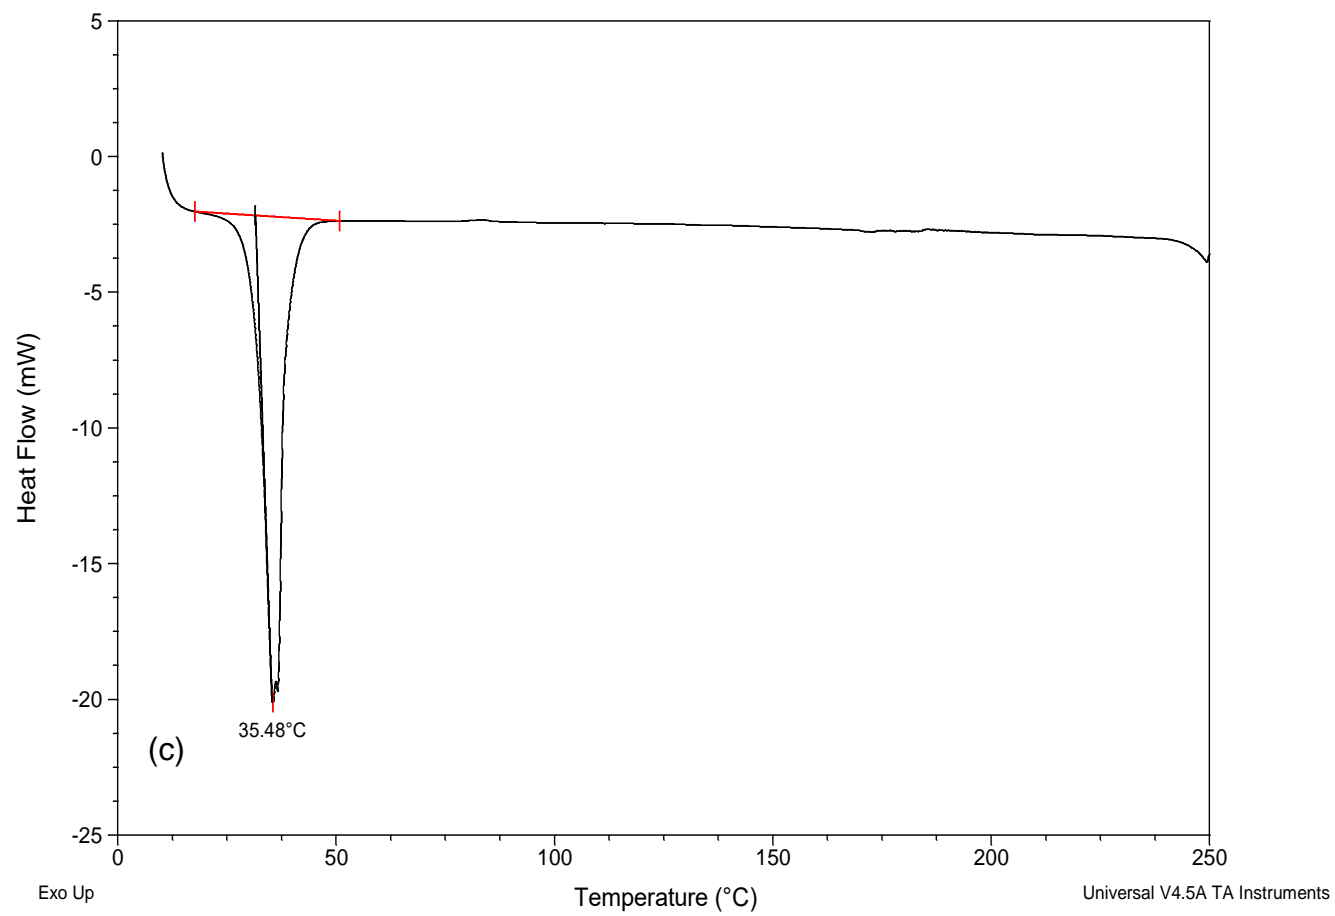

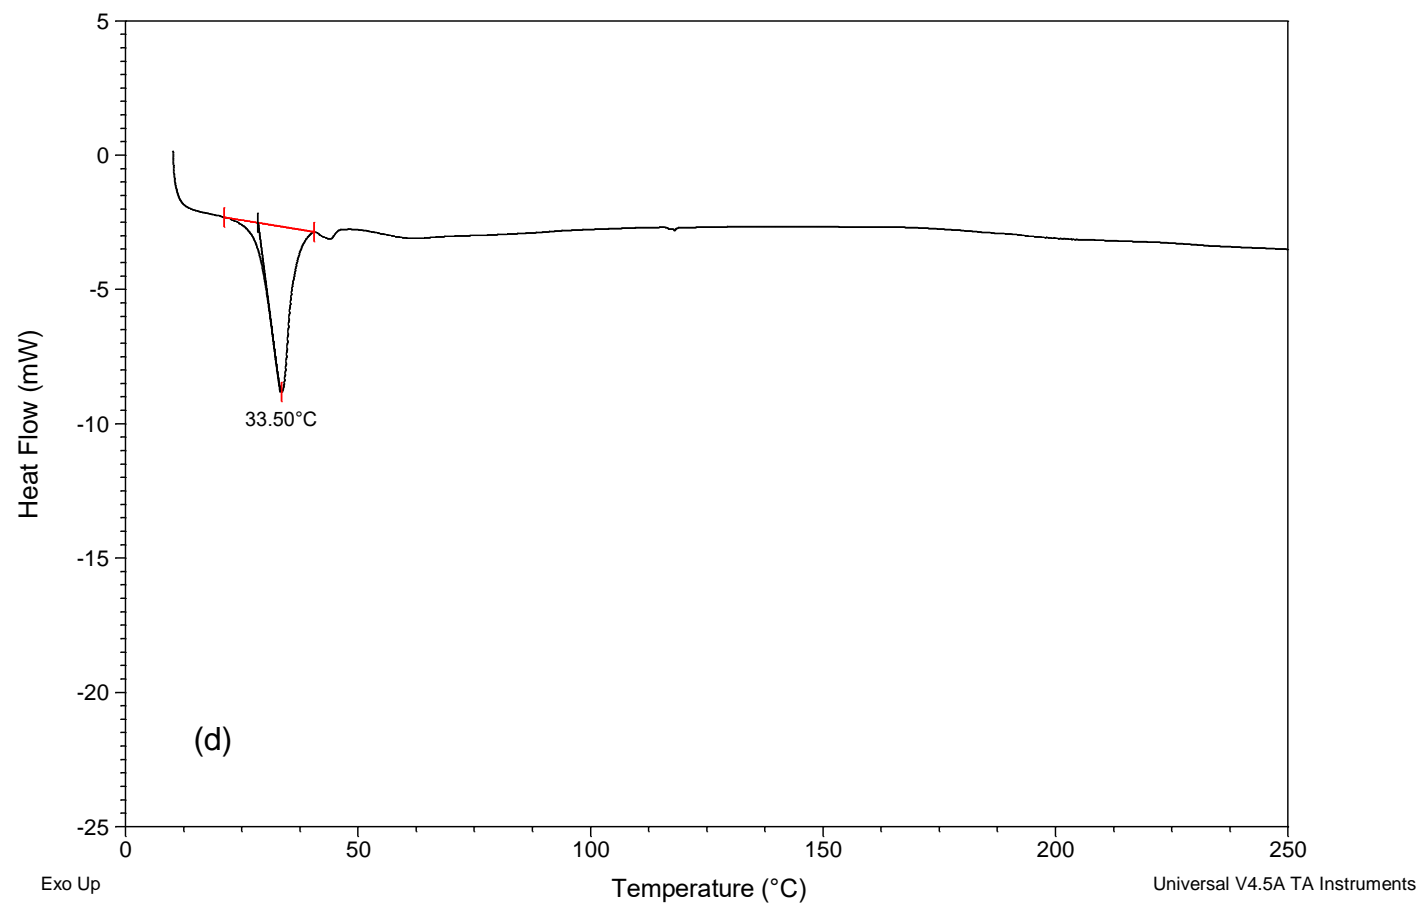

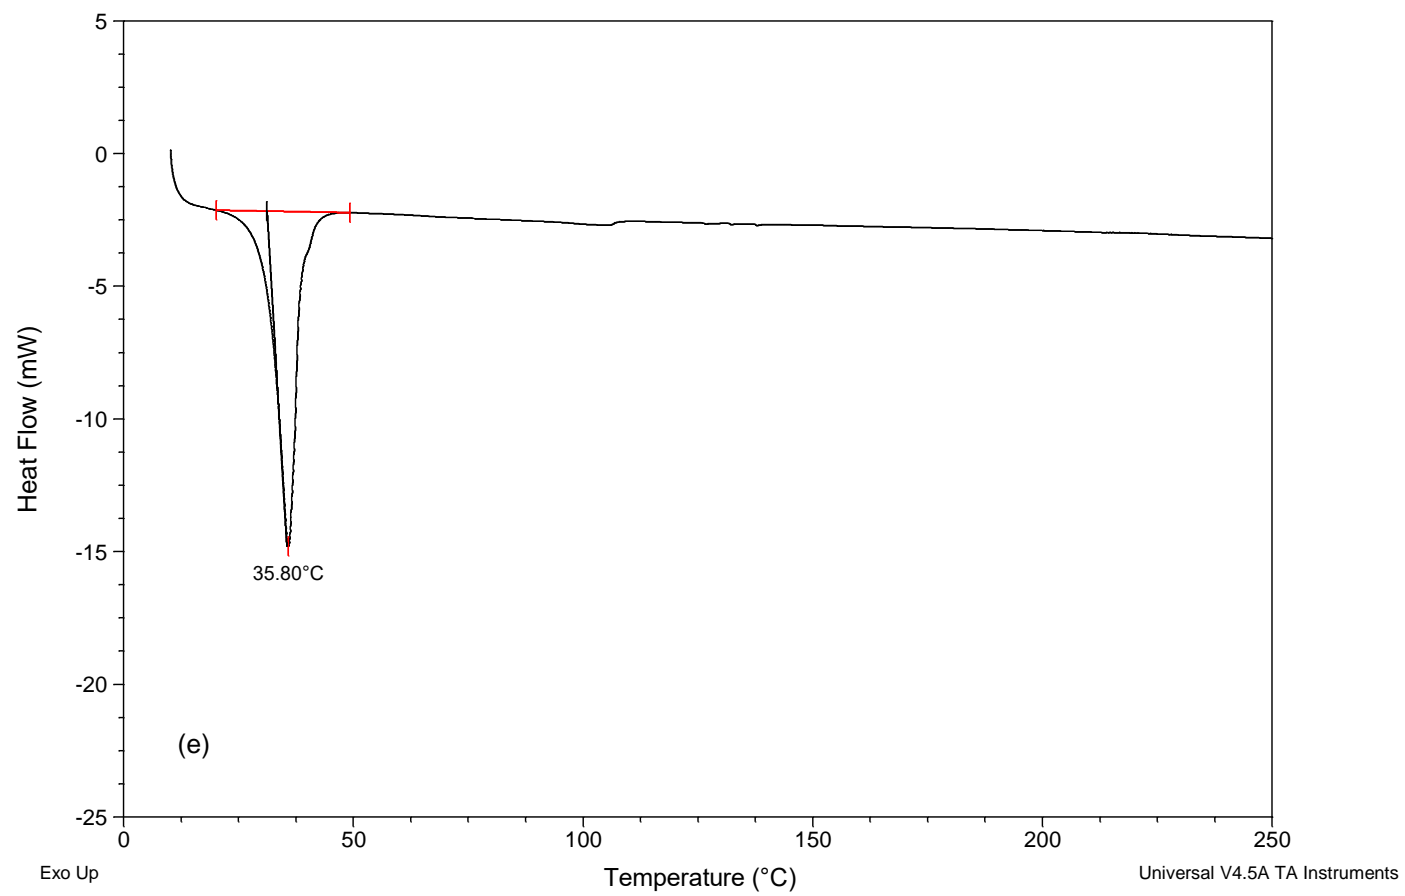

Supplement: s1 [file s1]

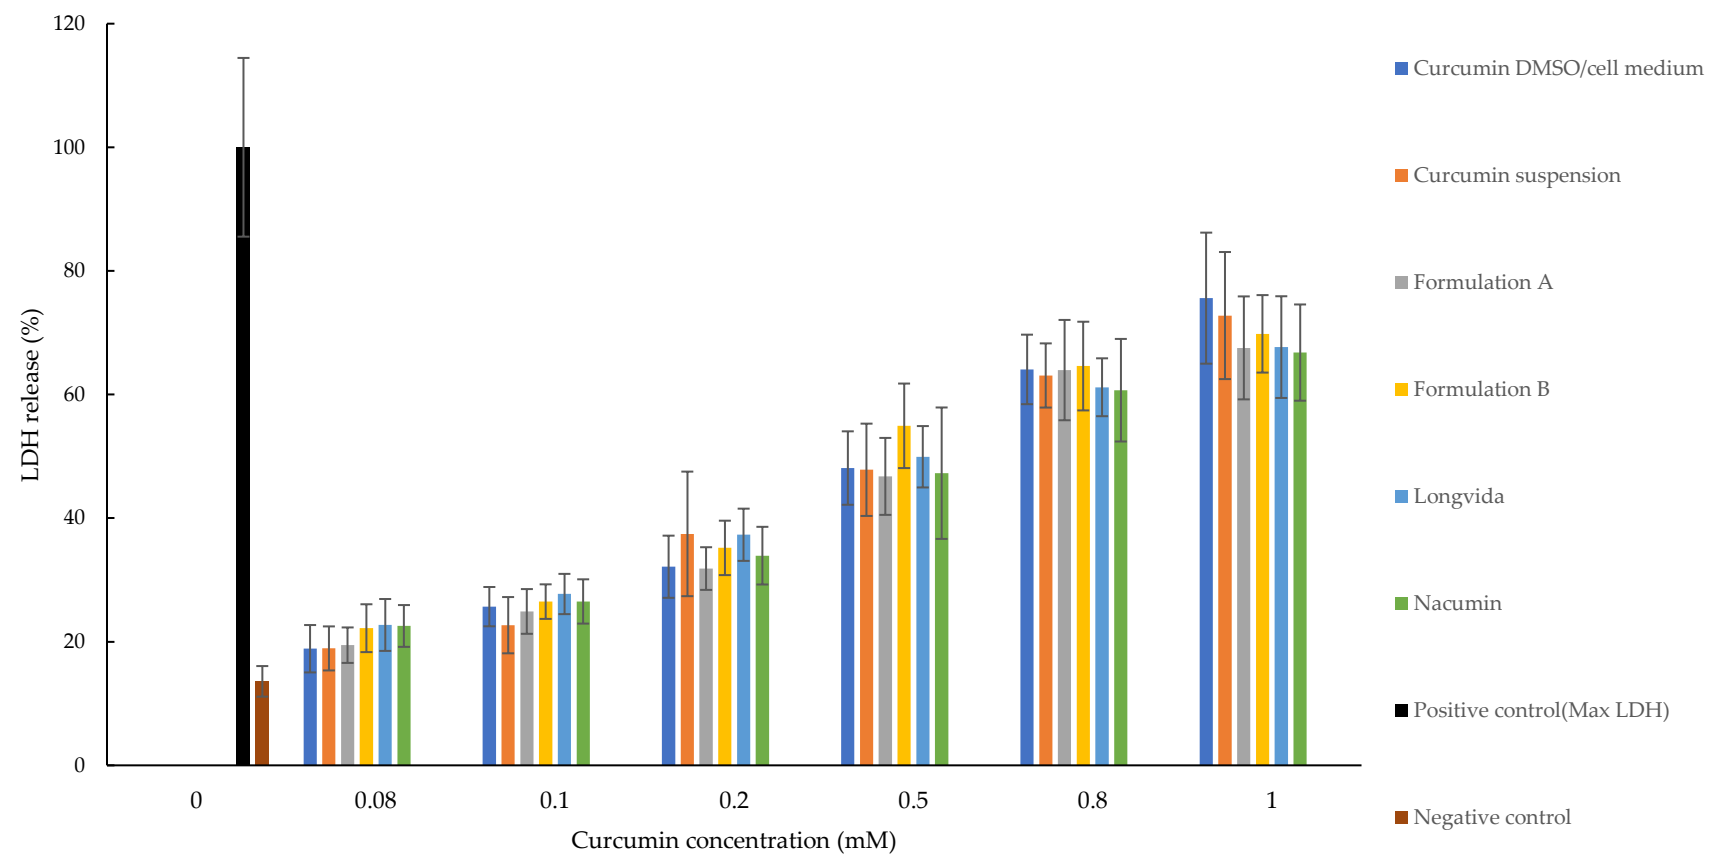

Supplement: s1 [file s1]

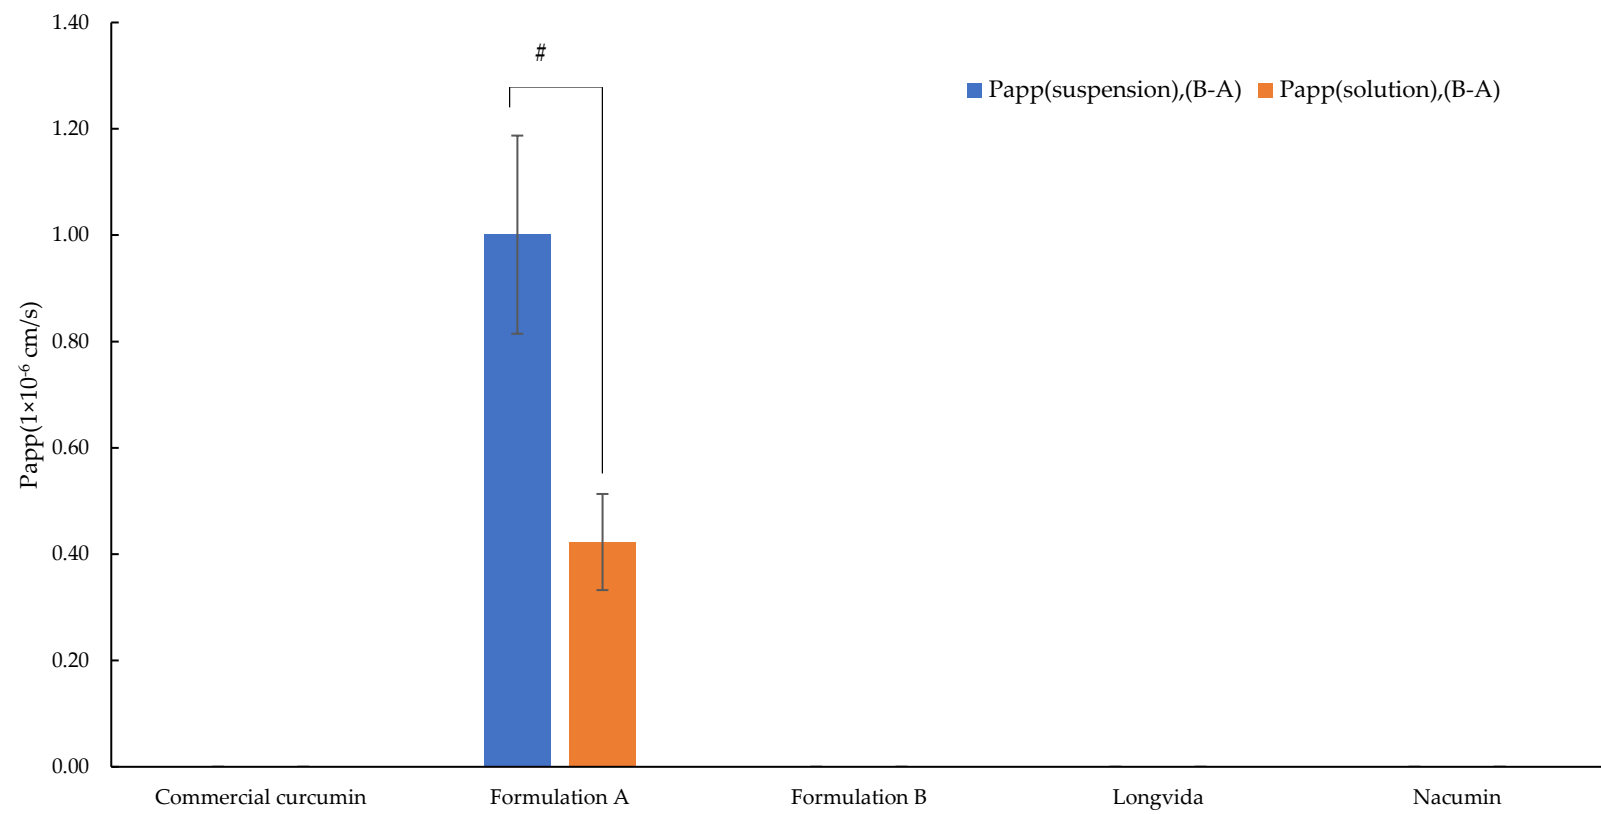

Supplement: s1 [file s1]

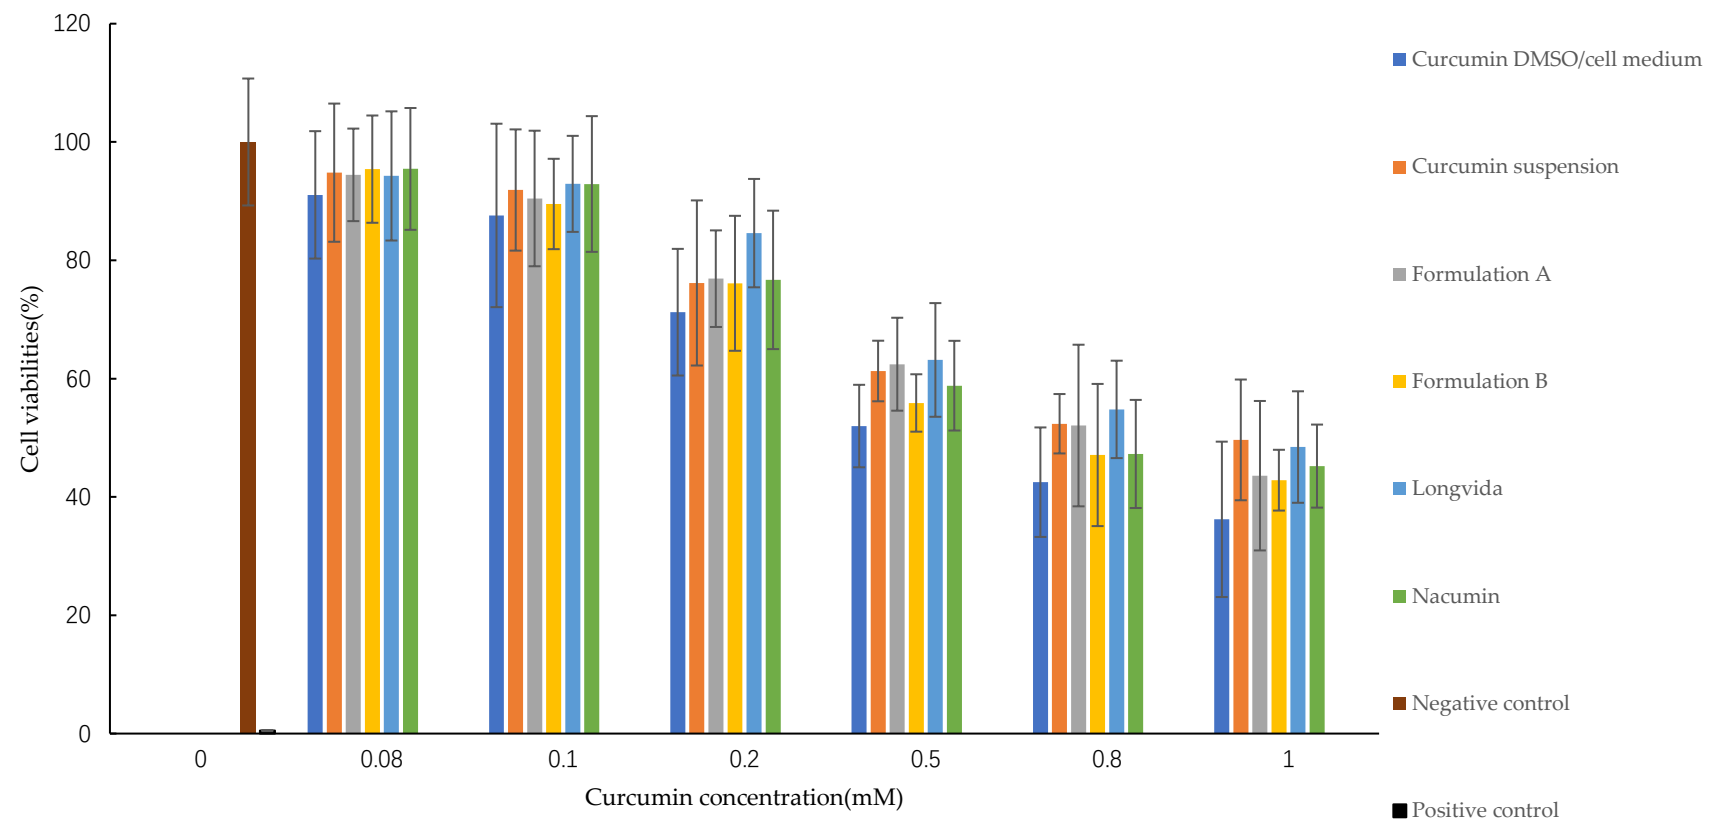

Supplement: s1 [file s1]

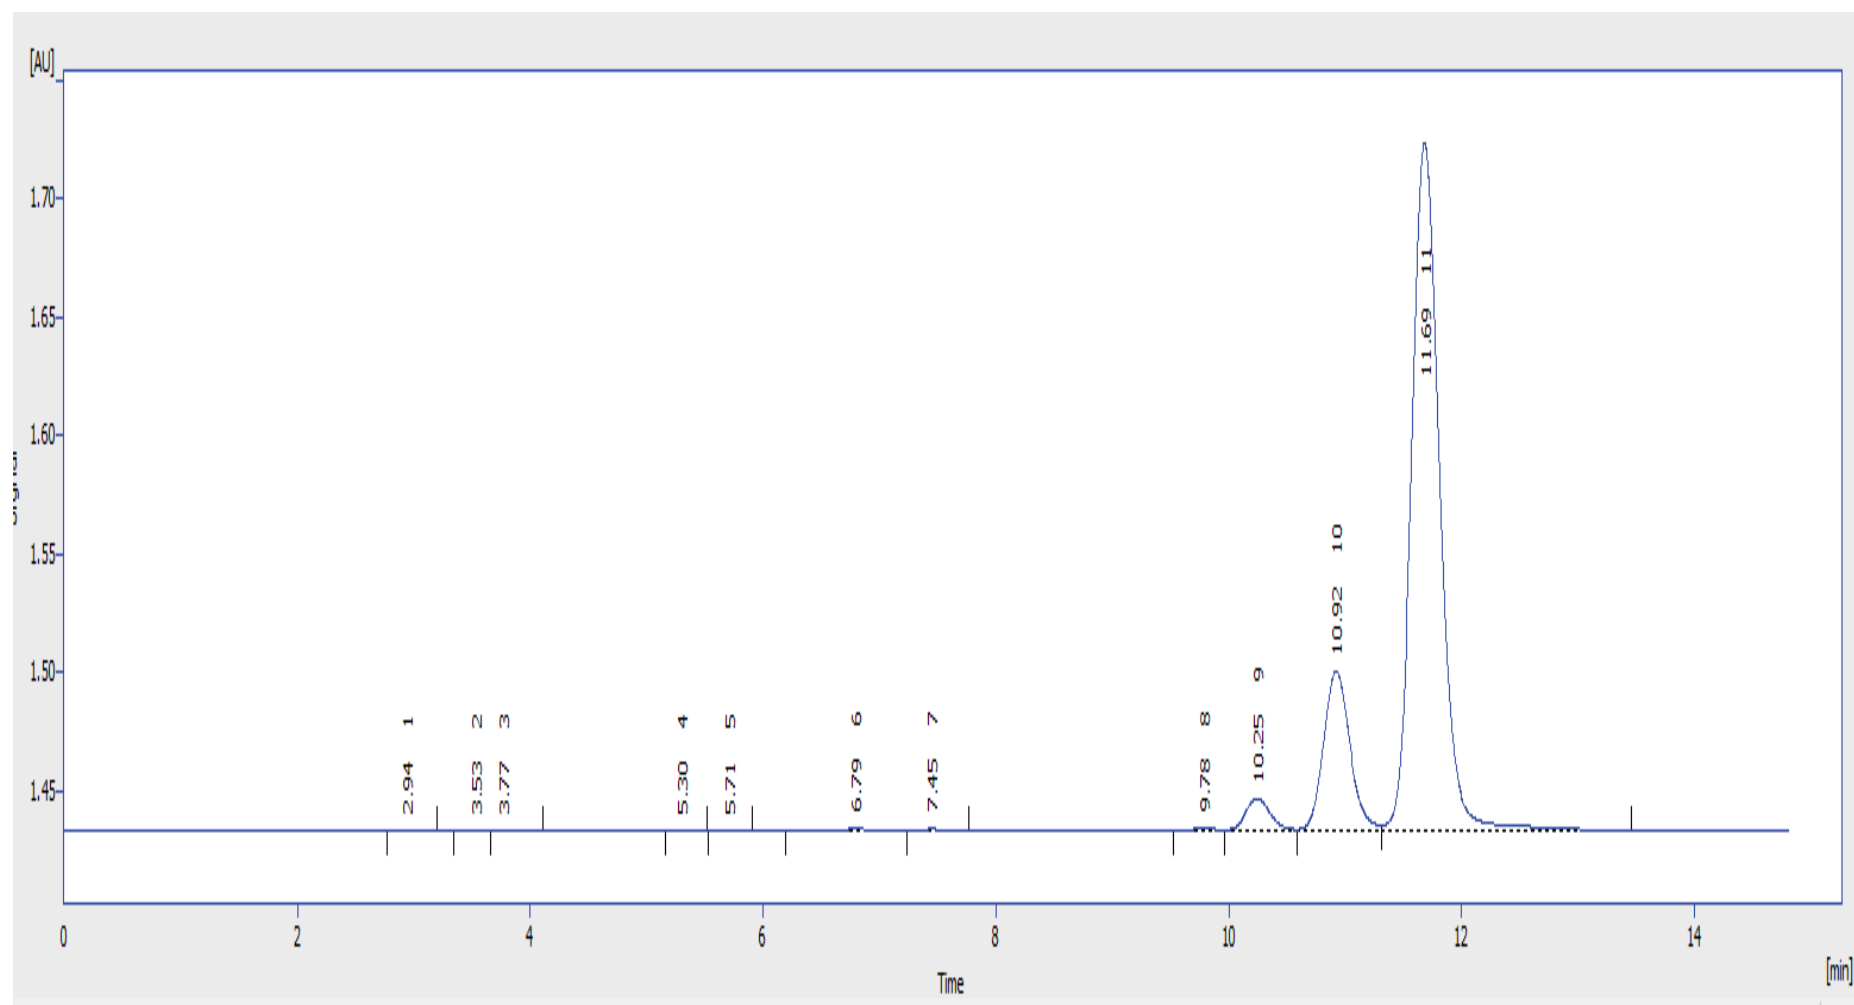

Supplement: s1 [file s1]

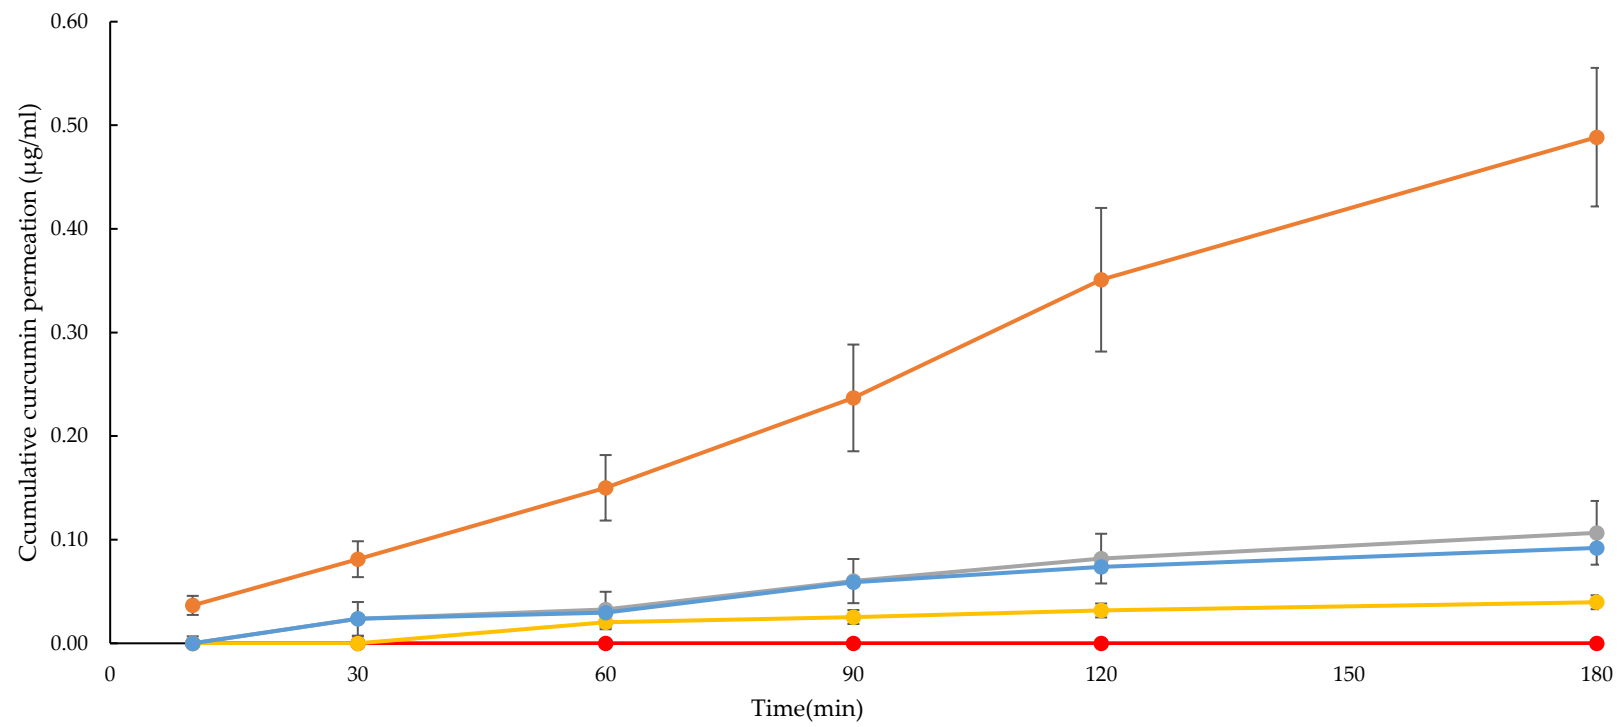

Commercial curcumin      Formulation A      Formulation B      Longvida      Nacumin

Supplement: s1 [file s1]

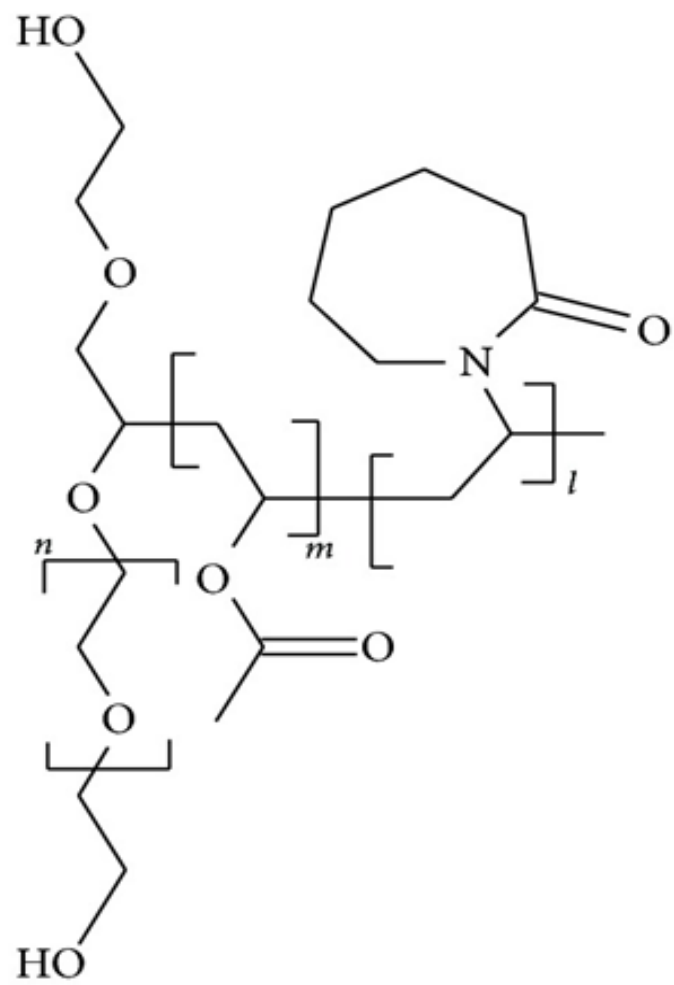

Supplement: s1 [file s1]

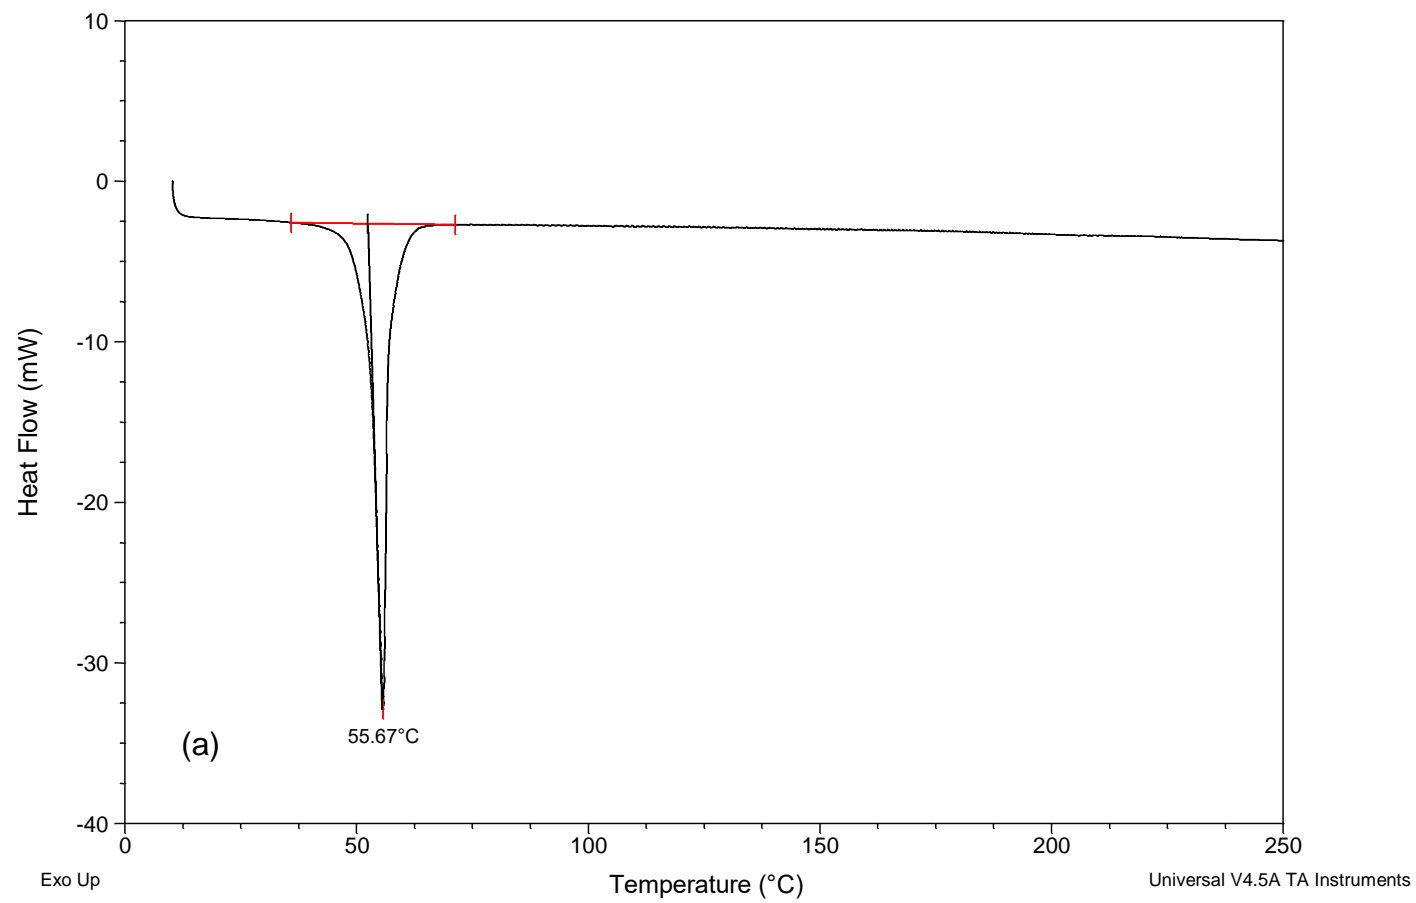

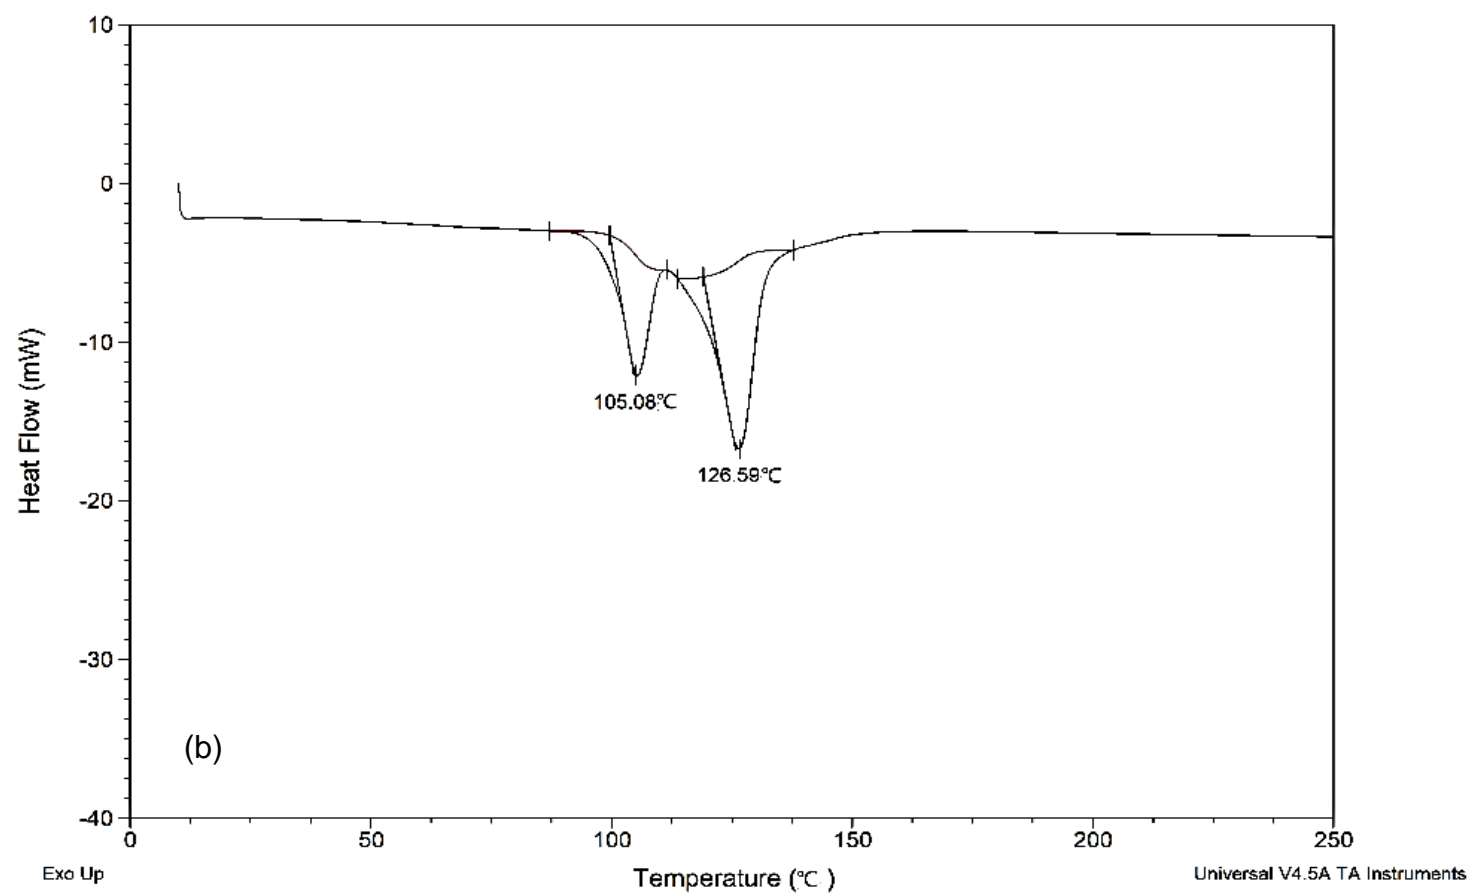

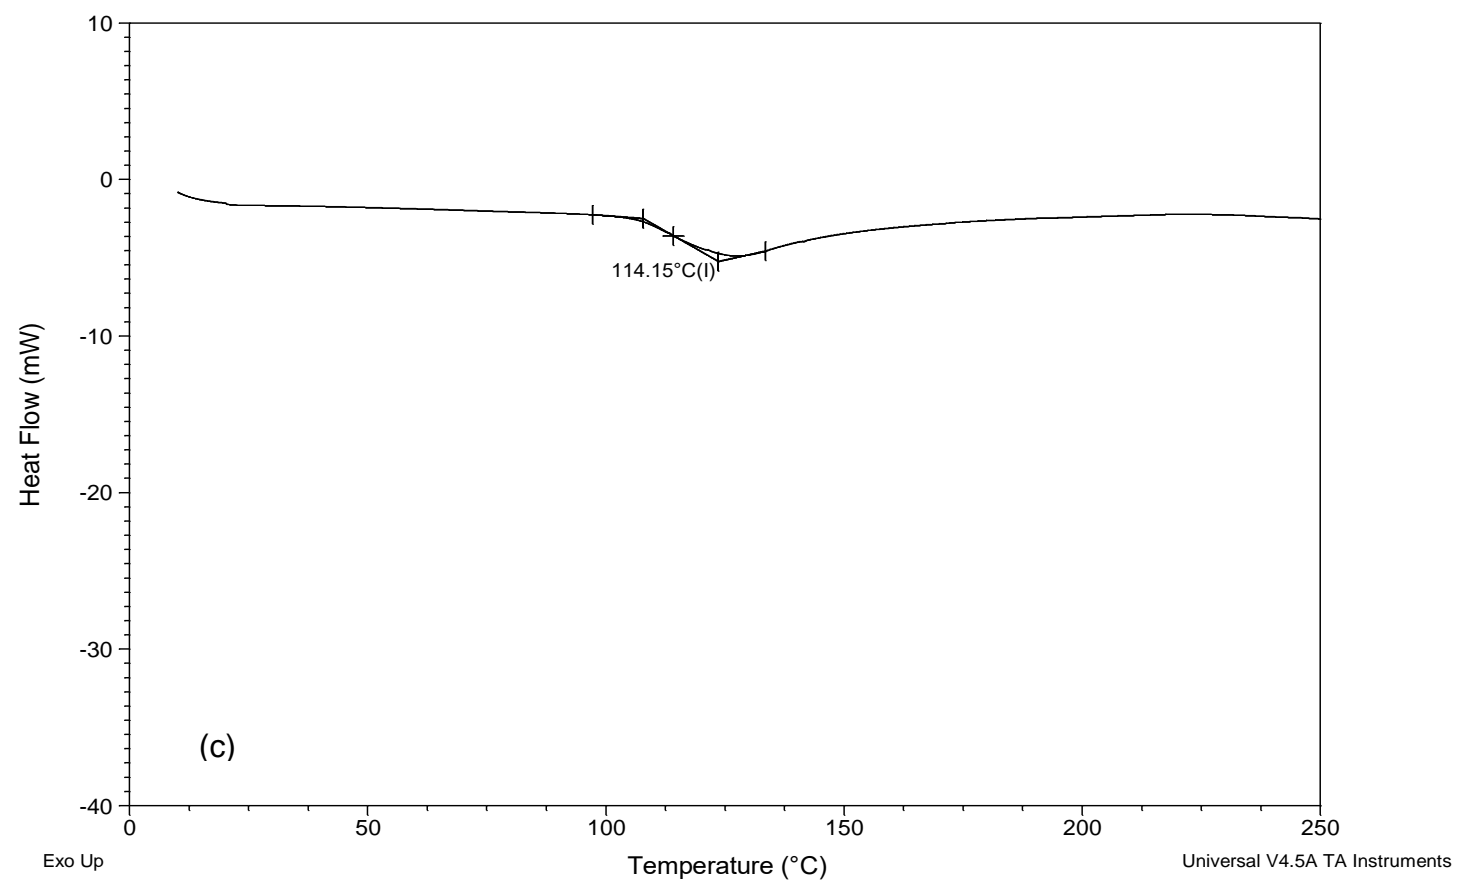

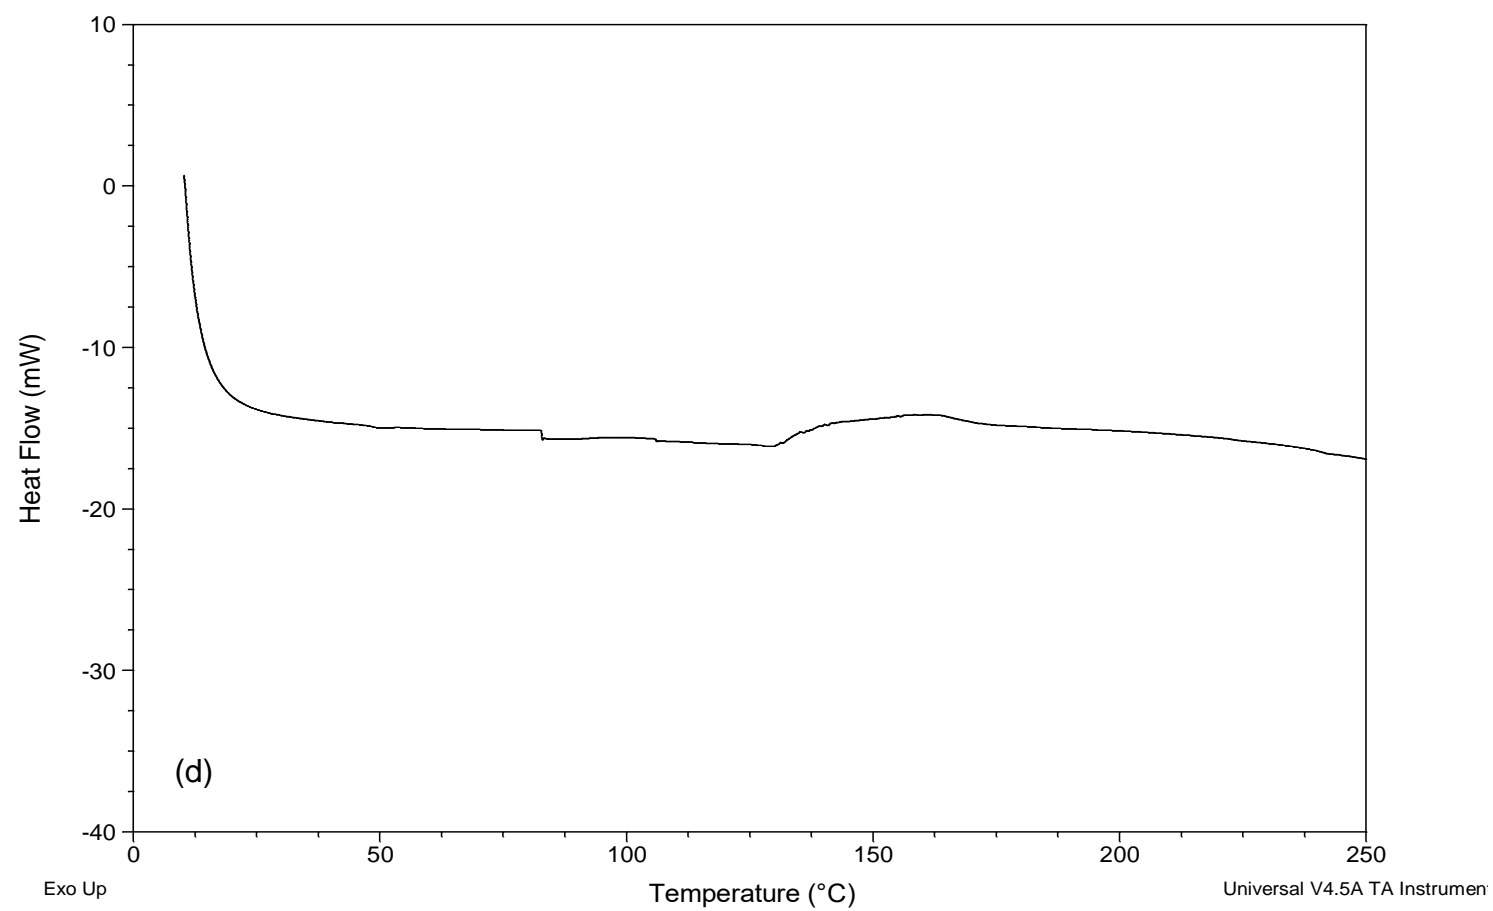

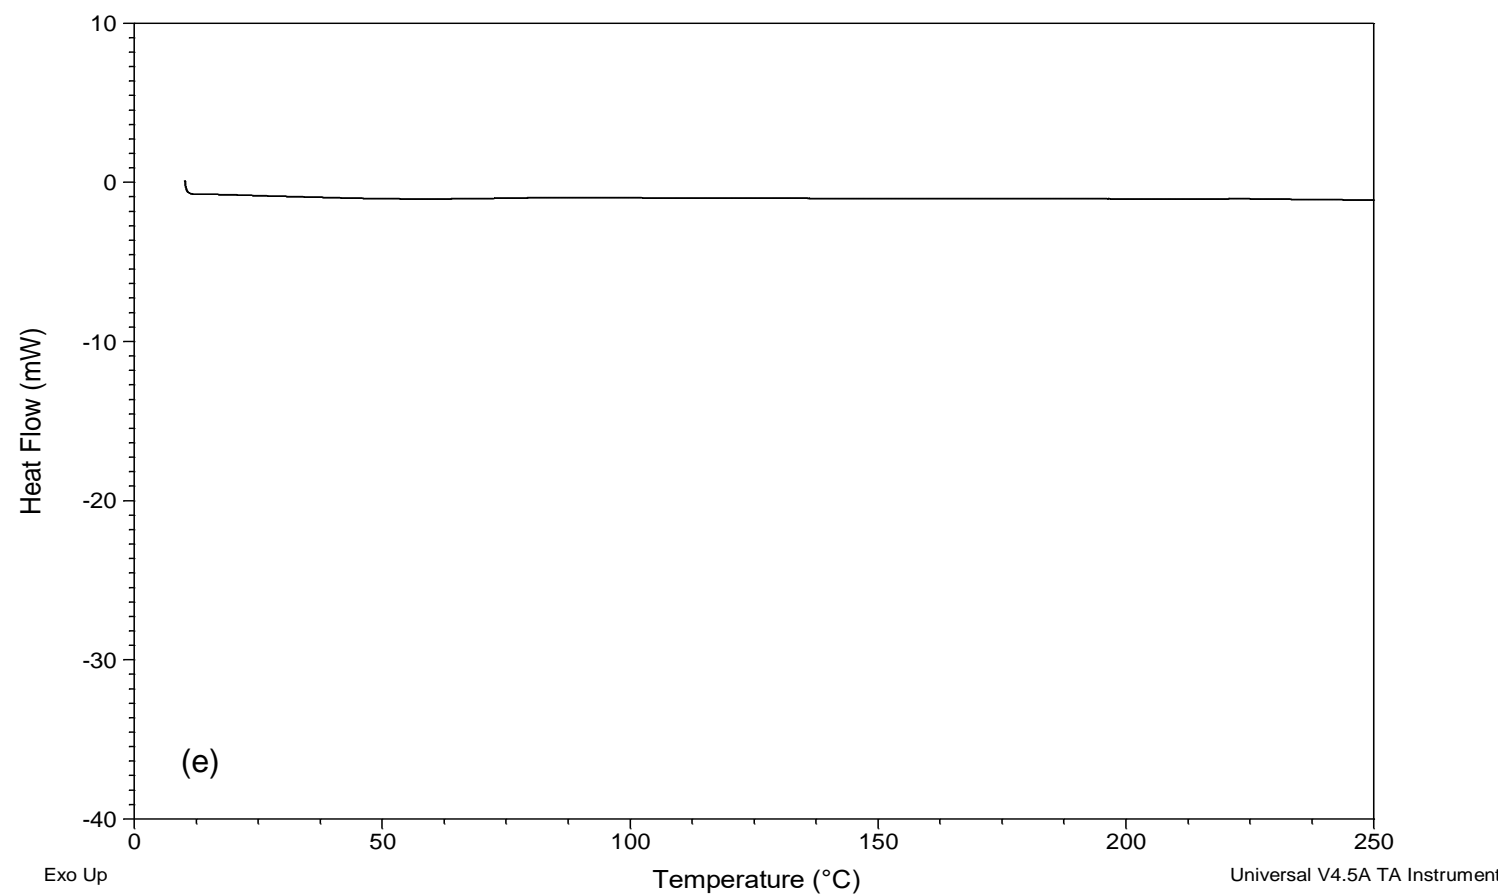

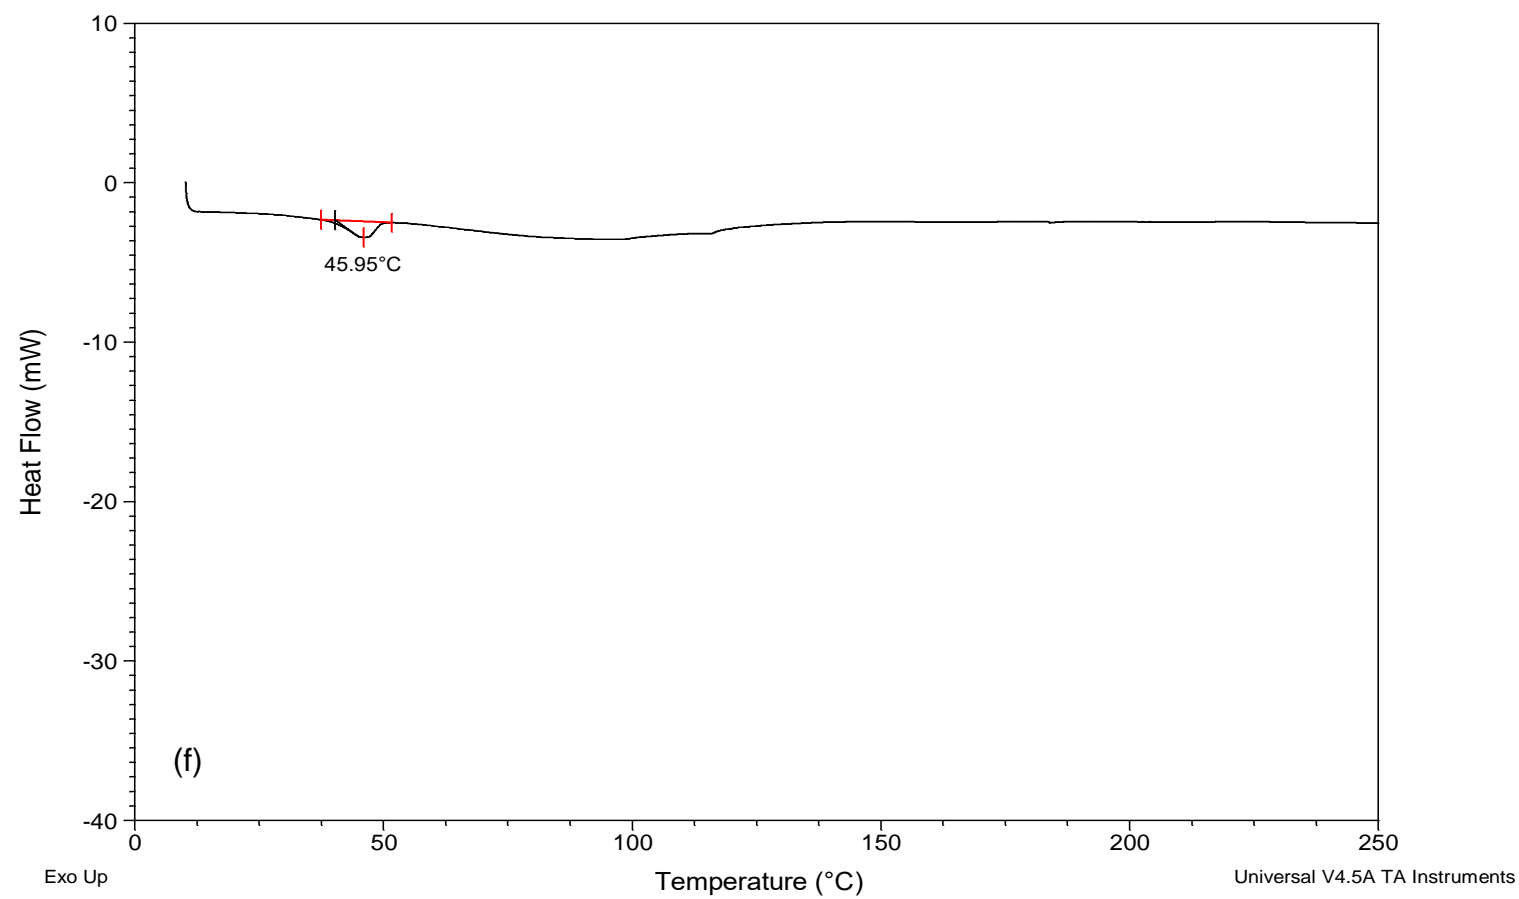

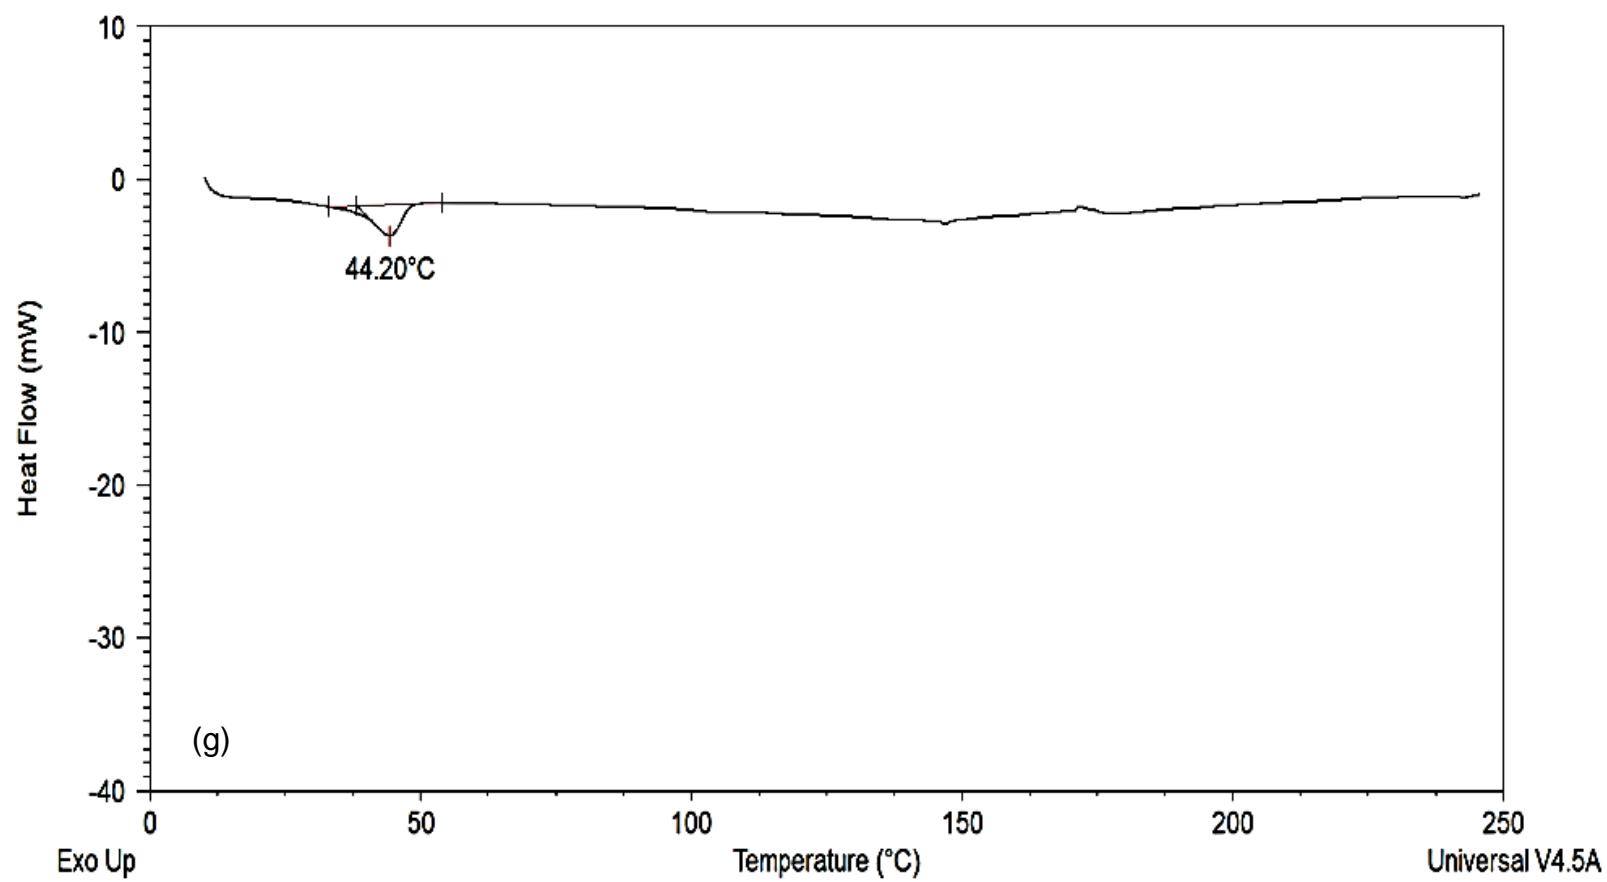

Supplement: s1 [file s1]

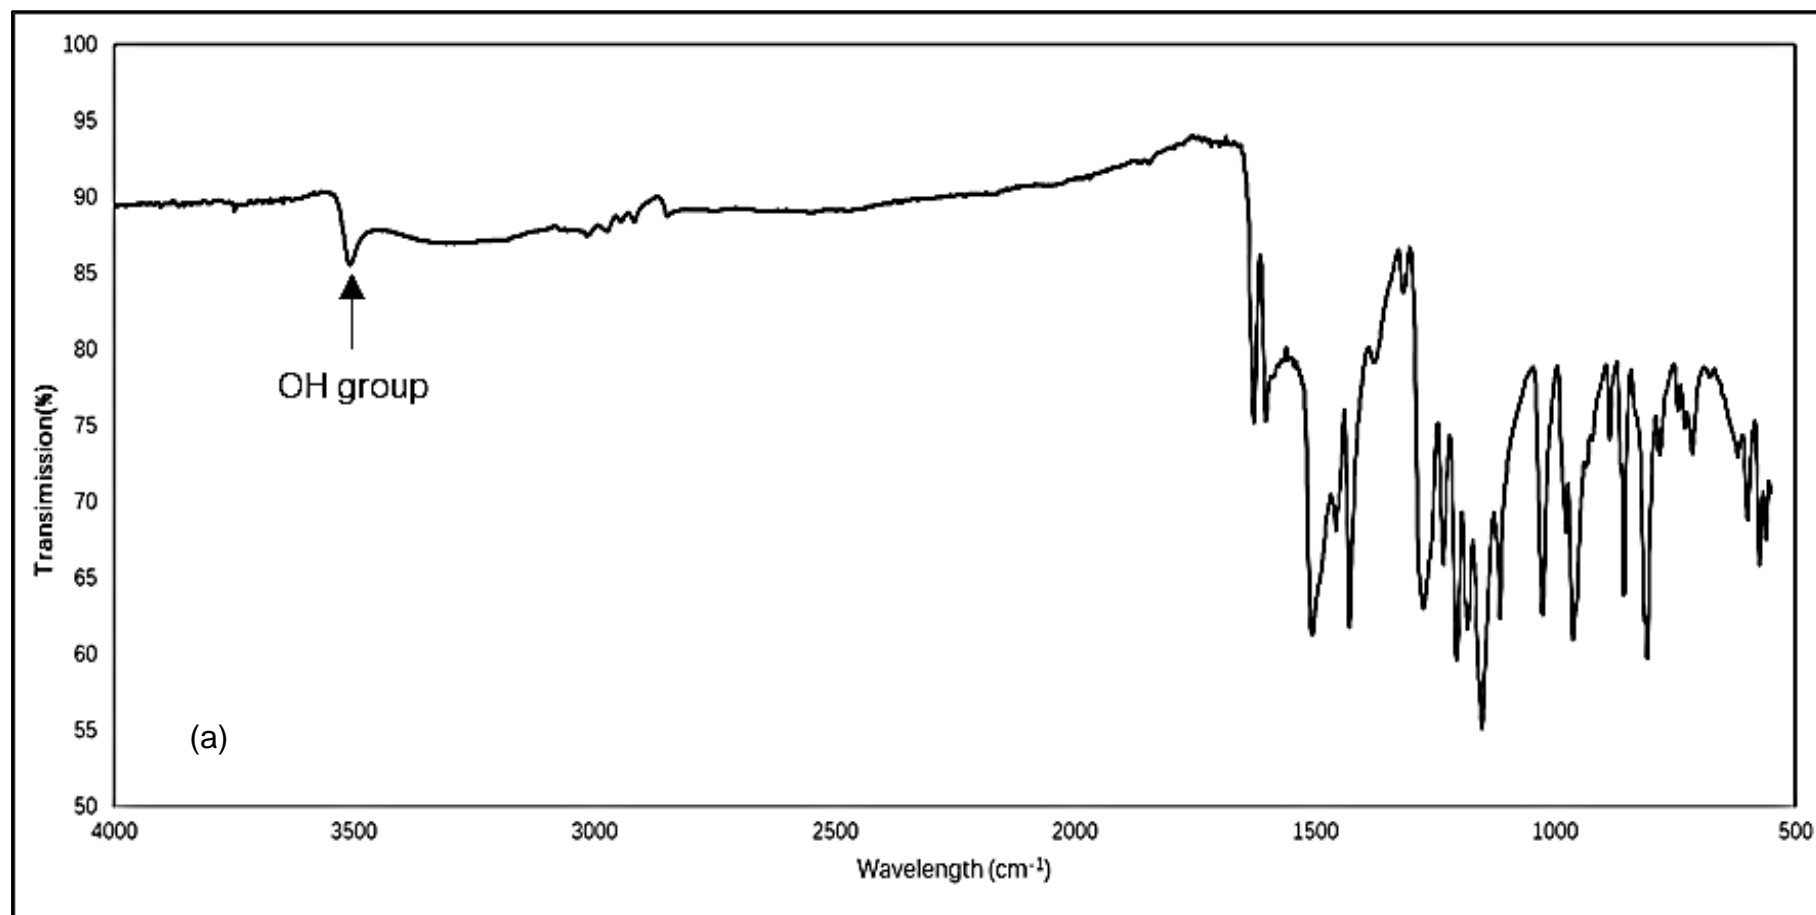

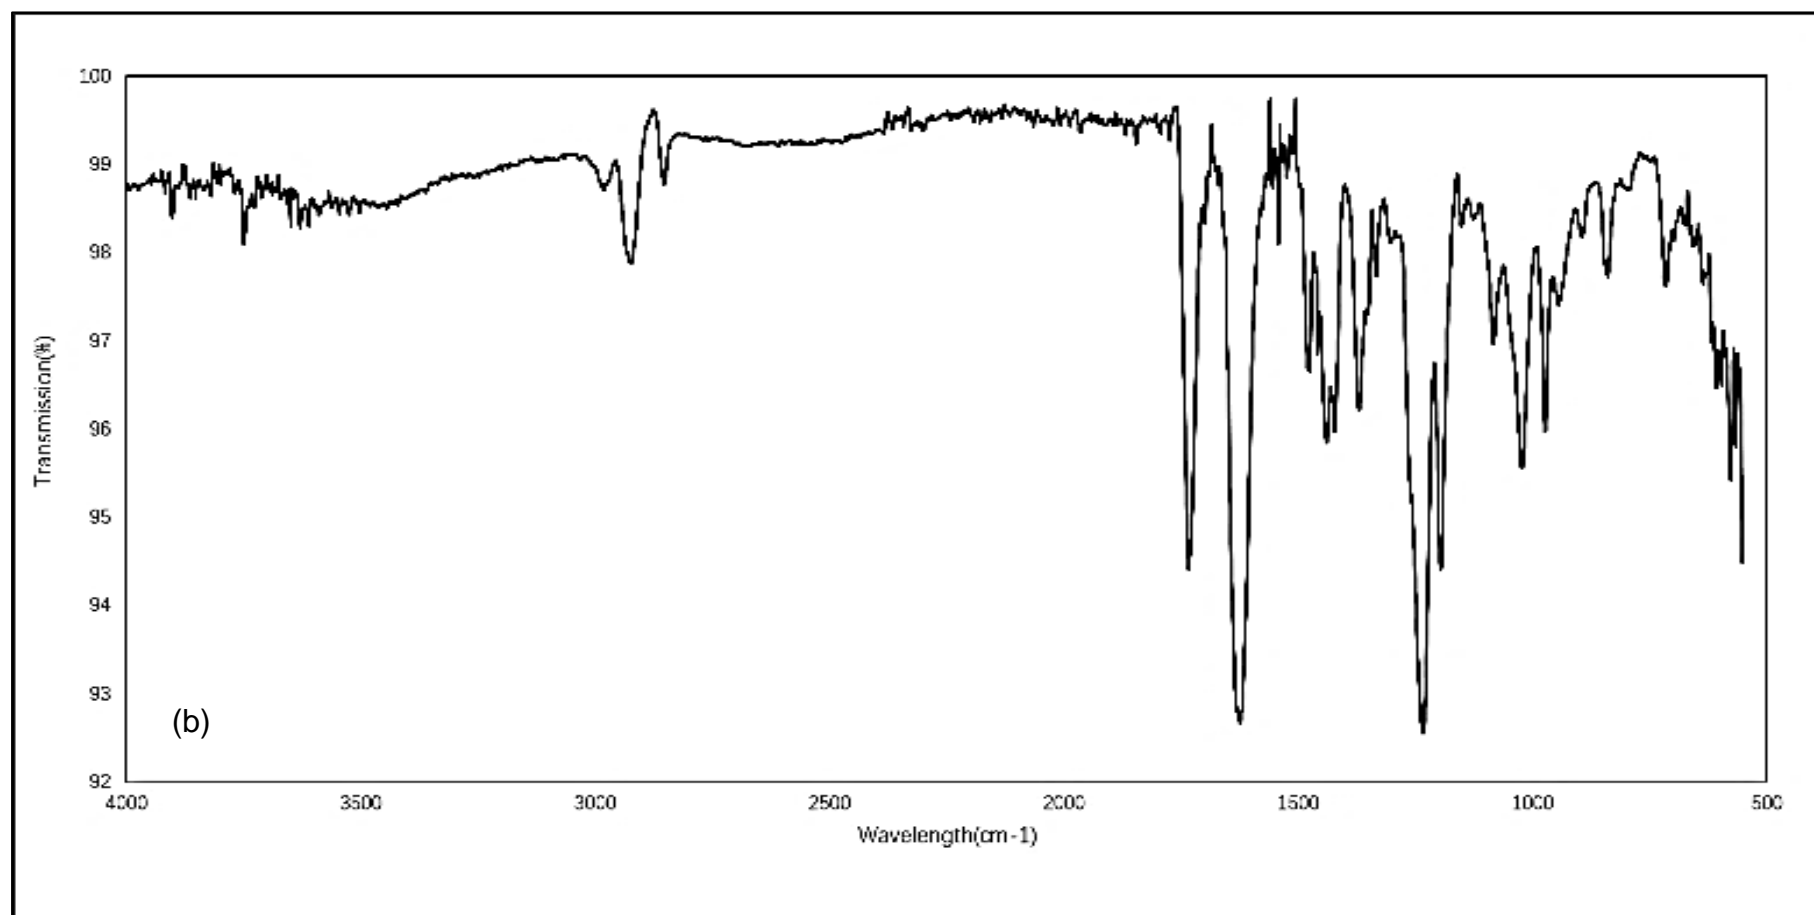

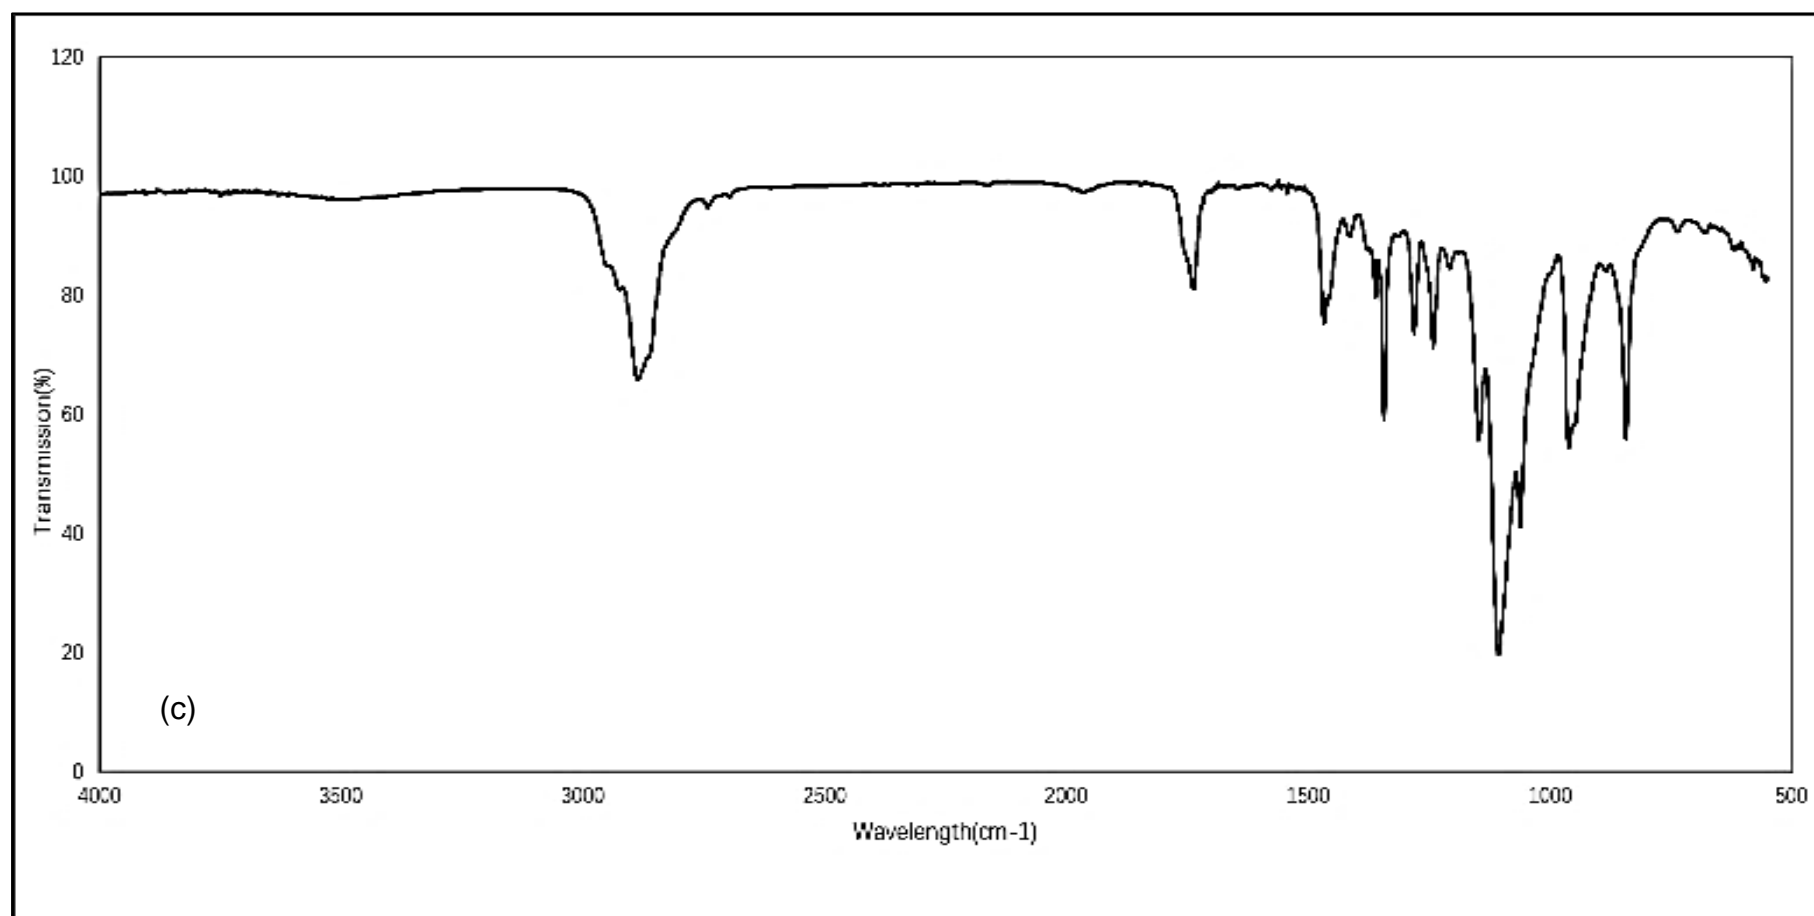

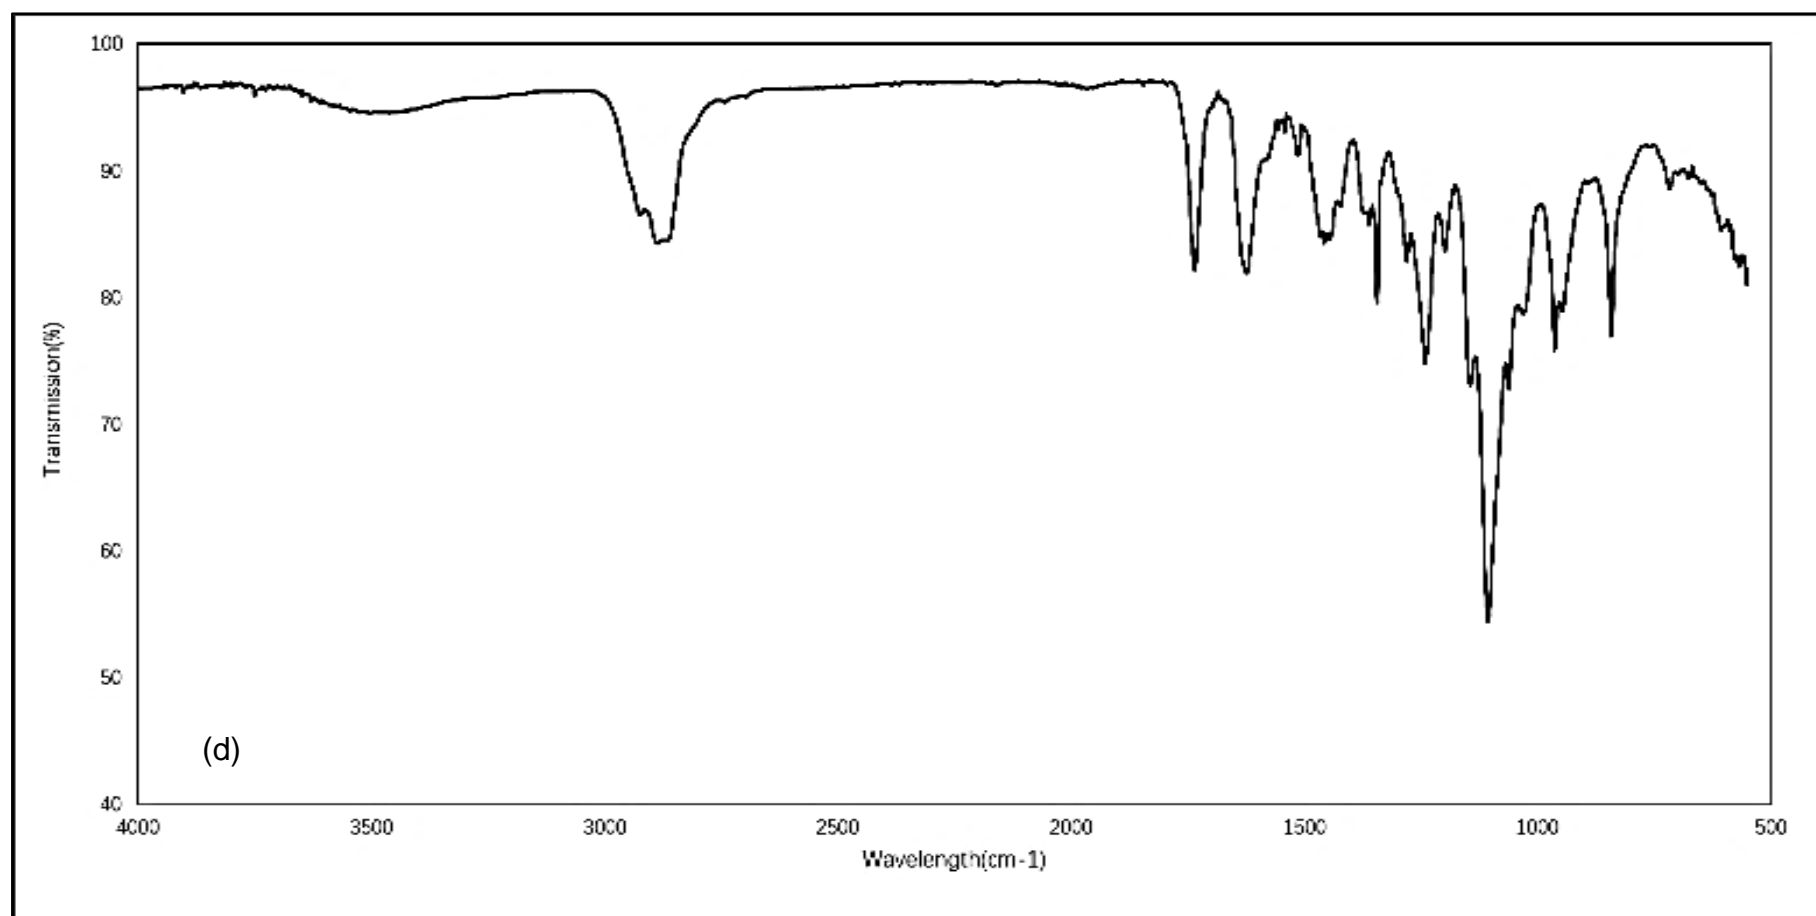

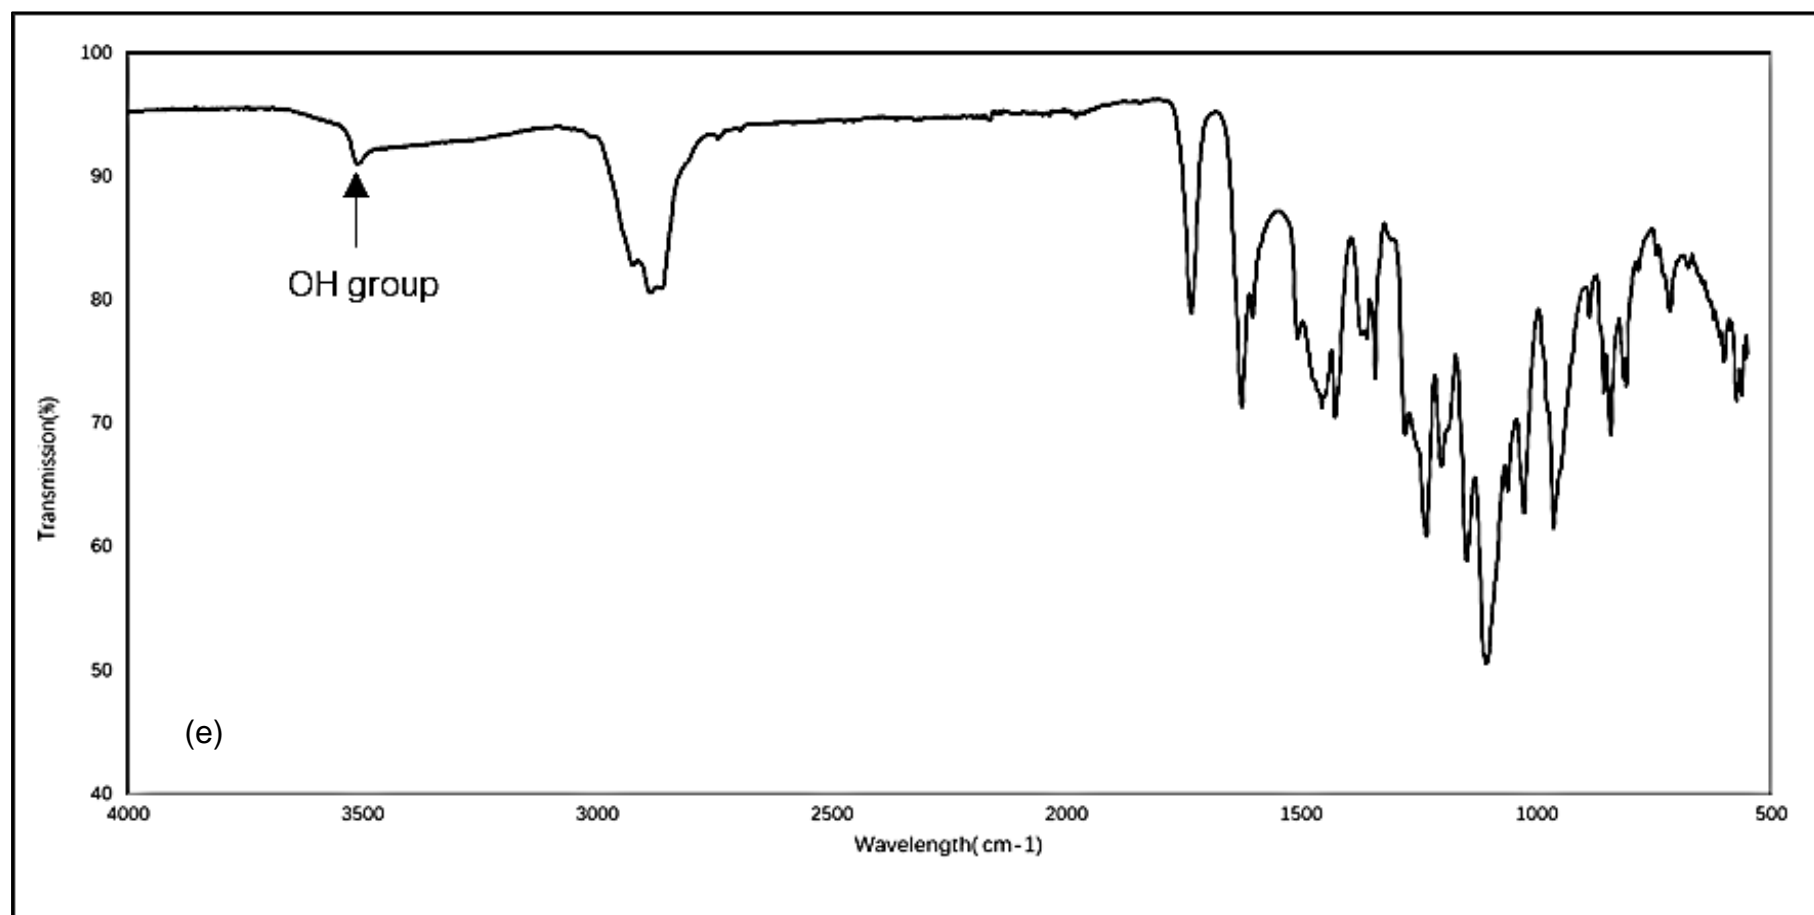

Supplement: s1 [file s1]

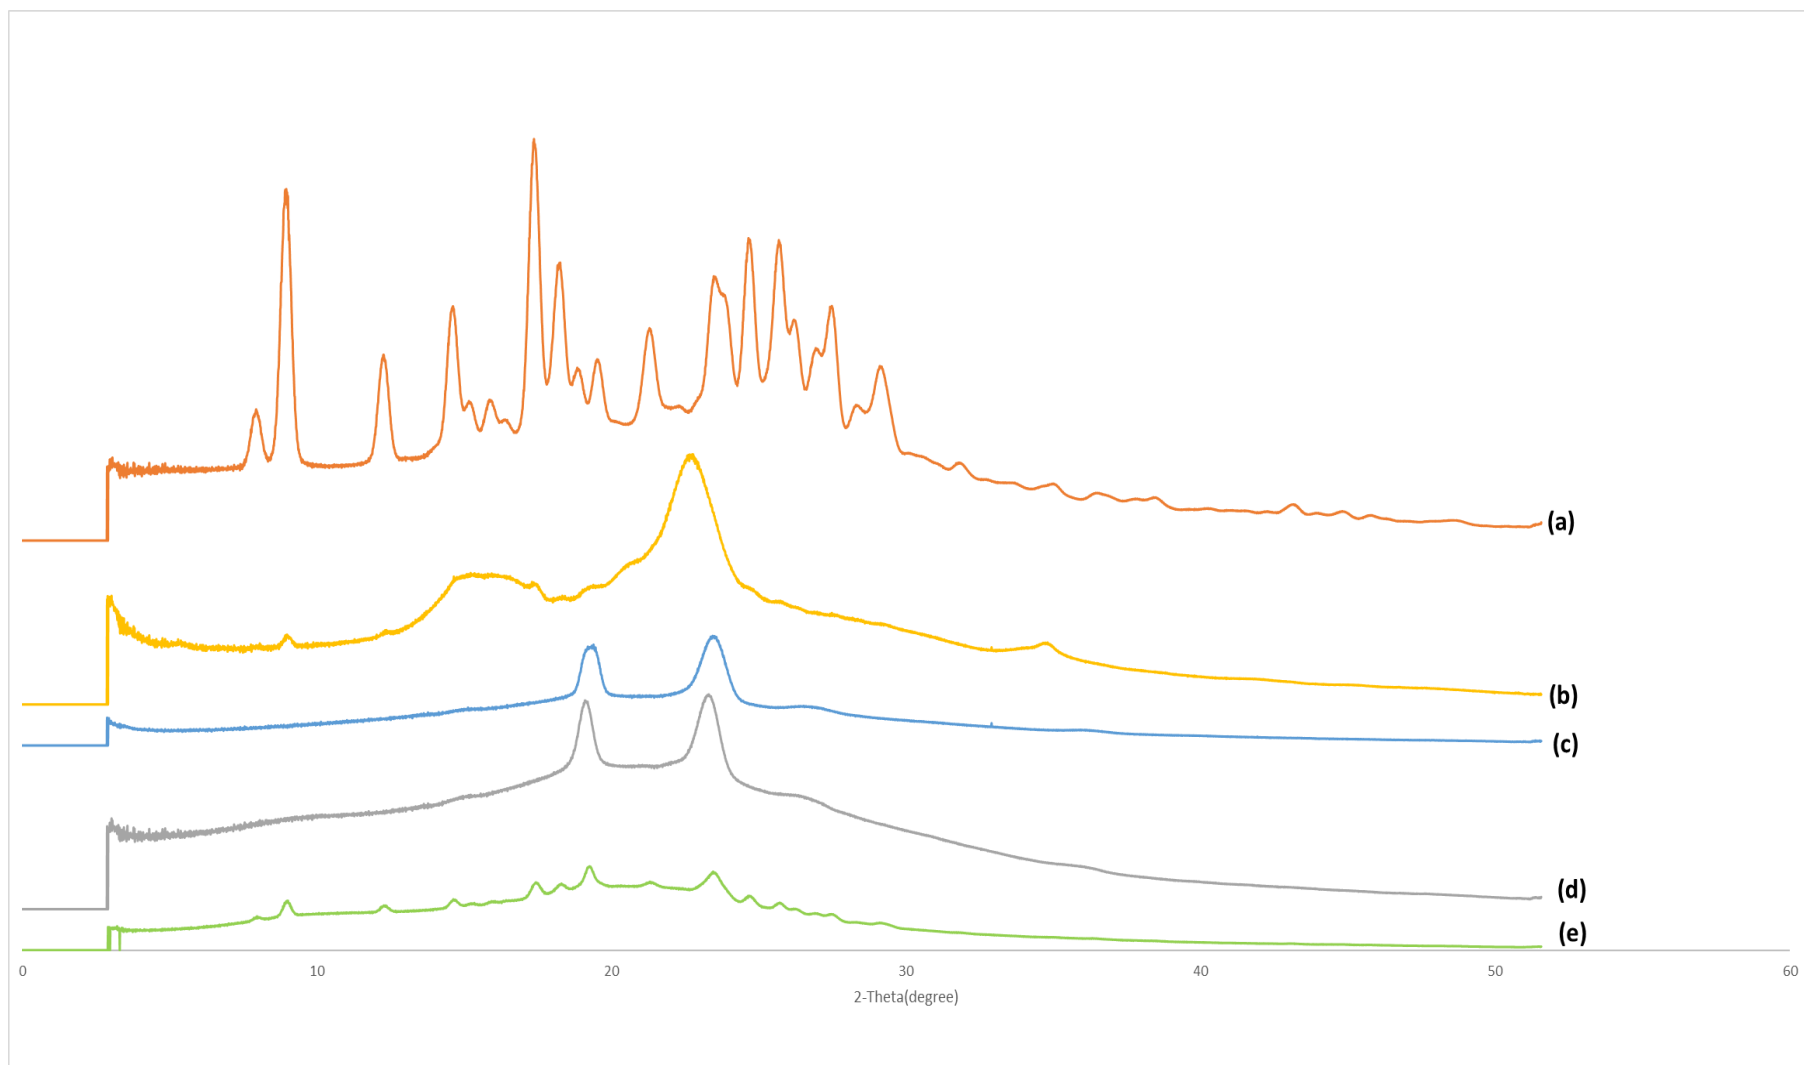

Supplement: s1 [file s1]
